# Supplementary material for: Piplartine-Inspired 3,4,5-Trimethoxycinnamates: Trypanocidal, Mechanism of Action, and In Silico Evaluation
Source: MDPI journal article supplement (doi:10.3390/molecules28114512), 2023-06-02
Supplement: s1 [file s1]

# Piplartine-Inspired 3,4,5-Trimethoxycinnamates: Trypanocidal, Mechanism of Action, and In Silico Evaluation

Carlos S. M. B. Filho <sup>1</sup>, Ramon R. P. B. de Menezes <sup>2</sup>, Emanuel P. Magalhães <sup>2</sup>, Yunierkis P. Castillo <sup>3</sup>, Alice M. C. Martins <sup>2</sup> and Damião P. de Sousa <sup>1,\*</sup>

<sup>1</sup> Department of Pharmaceutical Sciences, Federal University of Paraíba, 58051-900 João Pessoa, PB, Brazil; carlosmaia1996@gmail.com

<sup>2</sup> Department of Clinical and Toxicological Analysis, Federal University of Ceará, Fortaleza 60020-181, CE, Brazil; ramonppessoa@ufc.br (R.R.P.B.d.M.); martinsalice@gmail.com (E.P.M.); martinsalice@gmail.com (A.M.C.M.)

<sup>3</sup> Escuela de Ciencias Físicas y Matemáticas, Universidad de Las Américas, Quito 170125, Ecuador; yunierkis@gmail.com

\* Correspondence: damiao\_desousa@yahoo.com.br

**Abstract:** Chagas disease (CD) is one of the main neglected tropical diseases that promote relevant socioeconomic impacts in several countries. The therapeutic options for the treatment of CD are limited, and parasite resistance has been reported. Piplartine is a phenylpropanoid imide that has diverse biological activities, including trypanocidal action. Thus, the objective of the present work was to prepare a collection of thirteen esters analogous to piplartine (**1–13**) and evaluated the trypanocidal activity against *Trypanosoma cruzi*. Of the tested analogues, compound **11** ((*E*)-furan-2-ylmethyl 3-(3,4,5-trimethoxy-phenyl)acrylate) showed good activity with IC<sub>50</sub> values = 28.21±5.34 µM and 47.02±8.70 µM, against the epimastigote and trypomastigote forms, respectively. Also, it showed a high rate of selectivity to the parasite. The trypanocidal mechanism of action occurs through the induction of oxidative stress and mitochondrial damage. In addition, scanning electron microscopy showed a formation of pores and leakage of cytoplasmic content. Molecular docking indicated that **11** probably produces a trypanocidal effect through a multi-target mechanism, including affinity with protein CRK1, MPK13, GSK3B, AKR, UCE-1, and UCE-2, important for the survival of the parasite. Therefore, the results suggest chemical characteristics that can serve for the development of new trypanocidal prototypes for researching drugs against Chagas disease.

**Keywords:** natural products; phenylpropanoid; piplartine; alkamide; neglected diseases; molecular docking; *Trypanosoma*; *cruzi*; antiparasitic activity

## Experimental:

### Chemical characterization compounds **1–13**

(*E*)-Methyl 3-(3,4,5-trimethoxyphenyl)acrylate (**1**): white solid; Yield: 91.1%; Reaction time: 6 h; m.p.: 96–96°C (lit. 95–98°C); TLC (7:3 Hex/EtOAc), R<sub>f</sub> = 0.55; IR ν<sub>max</sub> (KBr, cm<sup>-1</sup>): 3006, 2946, 2838, 1697, 1634, 1583, 1505, 1469, 1249, 1128, 818; <sup>1</sup>H NMR (CDCl<sub>3</sub>, 500 MHz): δH 7.60 (*d*; *J*=15.92 Hz; 1H), 6.74 (*s*; 2H), 6.33 (*d*; *J*=15.92 Hz; 1H), 3.87 (*s*; 9H), 3.79 (*s*; 3H); <sup>13</sup>C NMR (CDCl<sub>3</sub>, 125 MHz): δC 167.4, 153.5, 144.9, 140.3, 130.0, 117.1, 105.4, 61.1, 56.3, 51.8 [1].

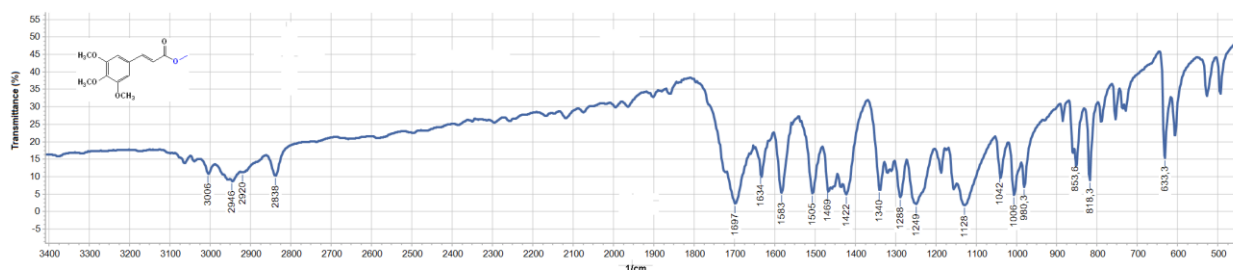

**Figure S1:** Infrared spectrum (KBr,  $\text{cm}^{-1}$ ) of (*E*)-methyl 3-(3,4,5-trimethoxyphenyl)acrylate (**01**).

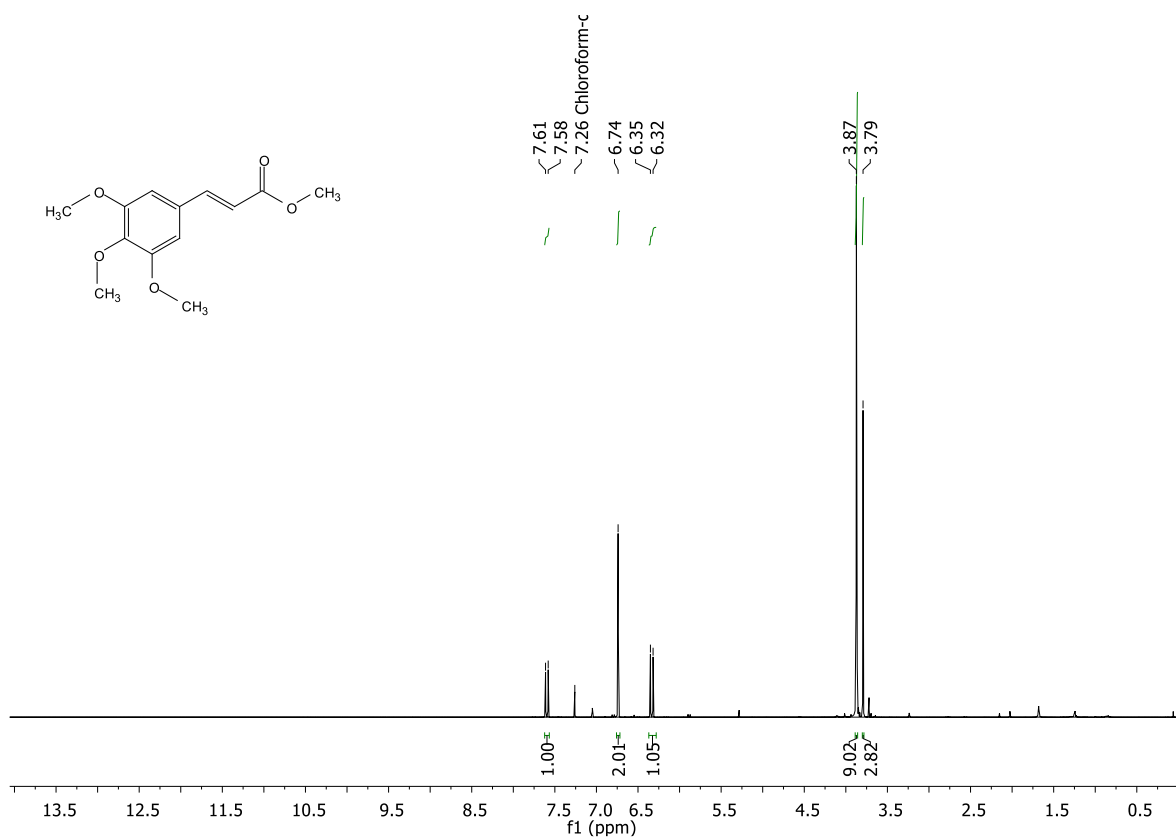

**Figure S2:**  $^1\text{H}$  NMR (500MHz,  $\text{CDCl}_3$ ) spectrum of (*E*)-methyl 3-(3,4,5-trimethoxyphenyl)acrylate (**01**).

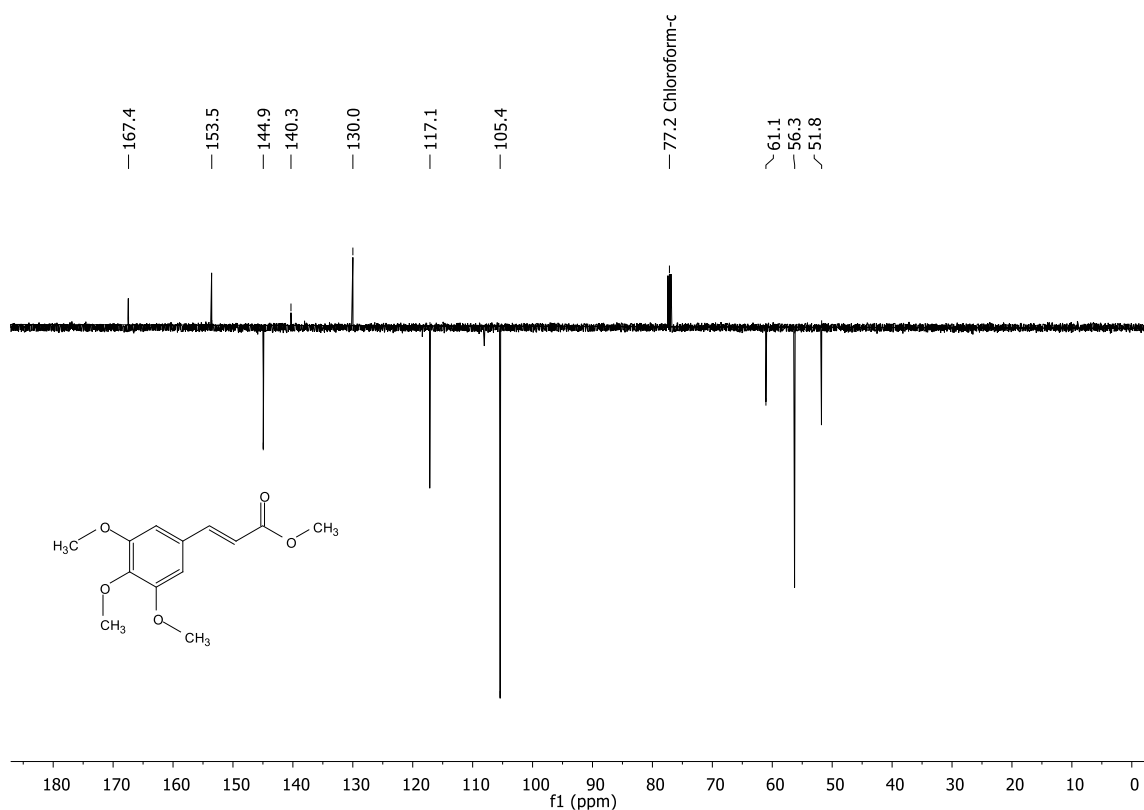

**Figure S3:** APT-<sup>13</sup>C NMR (125 MHz, CDCl<sub>3</sub>) spectrum of (*E*)-methyl 3-(3,4,5-trimethoxyphenyl)acrylate (**1**).

(*E*)-Ethyl 3-(3,4,5-trimethoxyphenyl)acrylate (**2**): white solid; Yield: 82.5%; Reaction time: 6 h; m.p.: 65-66°C (lit. 68-69°C); TLC (7:3 Hex/EtOAc), *R*<sub>f</sub> = 0.56; IR *ν*<sub>max</sub> (KBr, cm<sup>-1</sup>): 3004, 2946, 2838, 1702, 1636, 1582, 1504, 1456, 1280, 1123, 827; <sup>1</sup>H NMR (CDCl<sub>3</sub>, 500 MHz): δH 7.59 (*d*; *J*=15.91 Hz; 1H), 6.74 (*s*; 2H), 6.34 (*d*; *J*=15.91 Hz; 1H), 4.25 (*q*; *J*= 7.13 Hz; 2H); 3.87 (*s*; 9H); 1.34 (*t*; *J*=7.13 Hz; 3H); <sup>13</sup>C NMR (CDCl<sub>3</sub>, 125 MHz): δC 167.2, 153.8, 144.8, 140.5, 130.3, 118.0, 105.7, 61.3, 60.9, 56.5, 14.7 [2].

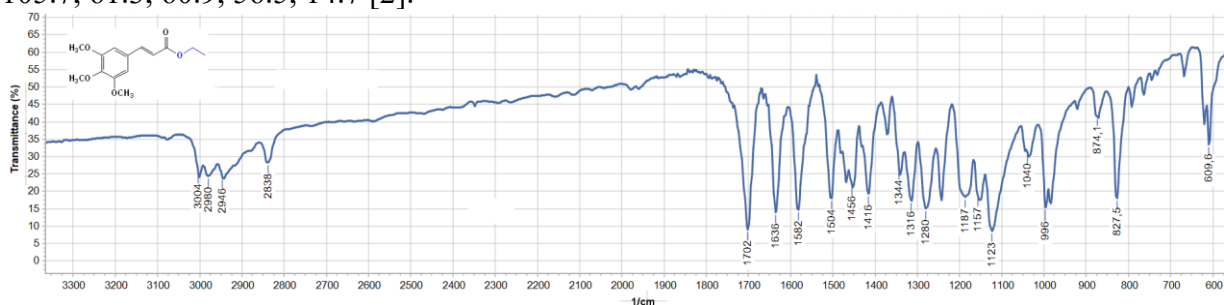

**Figure S4:** Infrared spectrum (KBr, cm<sup>-1</sup>) of (*E*)-ethyl 3-(3,4,5-trimethoxyphenyl)acrylate (**2**).

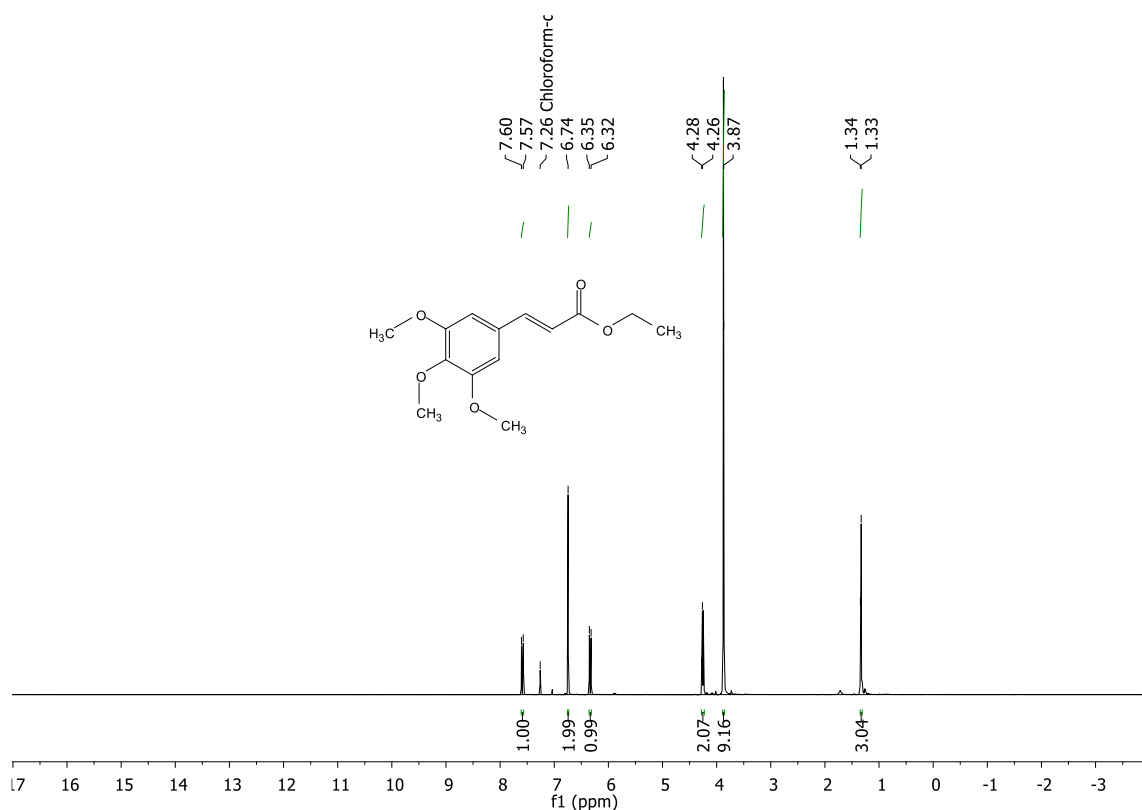

**Figure S5:** <sup>1</sup>H NMR spectrum (500 MHz, CDCl<sub>3</sub>) of (E)-ethyl 3-(3,4,5-trimethoxyphenyl)acrylate (2).

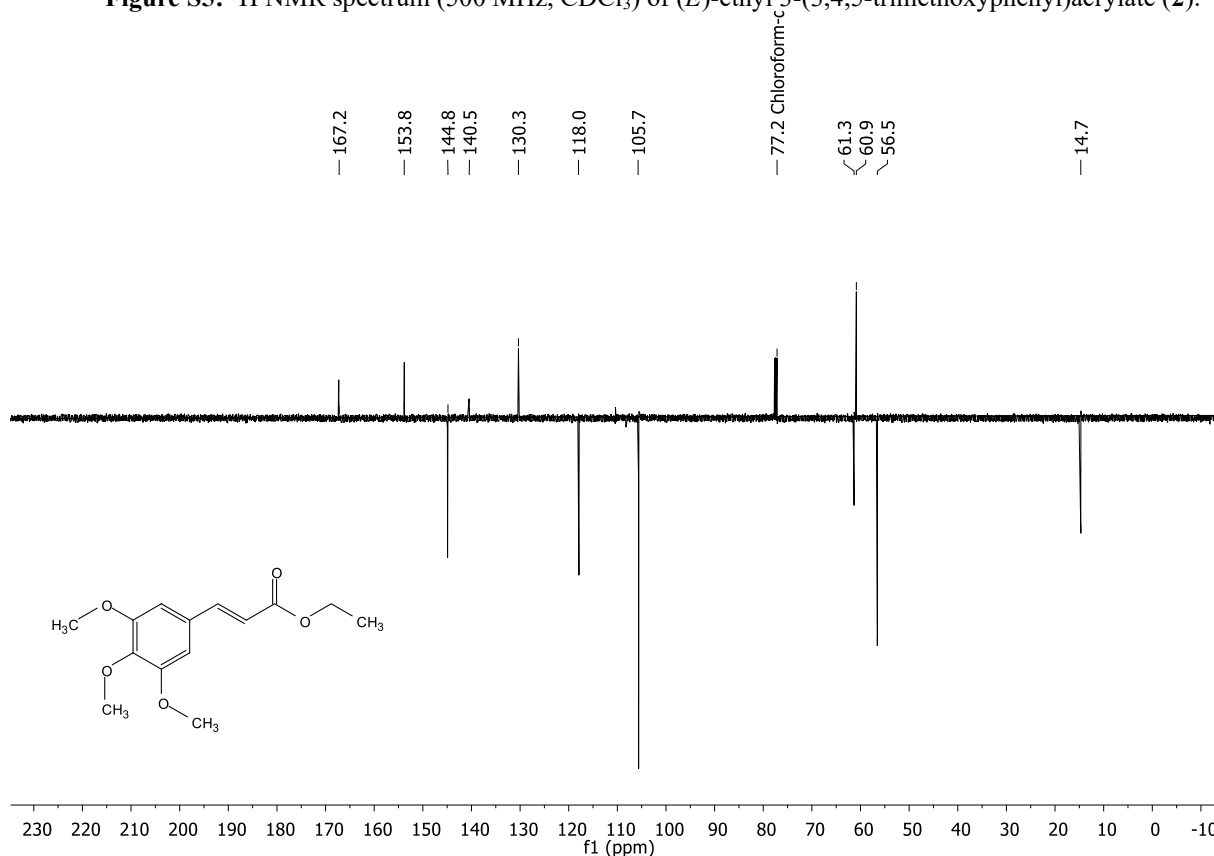

**Figure S6:** APT-<sup>13</sup>C NMR spectrum (125 MHz, CDCl<sub>3</sub>) of (E)-ethyl 3-(3,4,5-trimethoxyphenyl)acrylate (2).

(E)-propyl 3-(3,4,5-trimethoxyphenyl)acrylate (3): yellow solid; Yield: 79.9%; Reaction time: 6 h; m.p.: 73-74°C (lit. 58°C); TLC (7:3 Hex/EtOAc), R<sub>f</sub> = 0.58; IR ν<sub>max</sub> (KBr, cm<sup>-1</sup>): 3001, 2939, 2840, 1707, 1640, 1581, 1505, 1472, 1276, 1126, 846; <sup>1</sup>H NMR (CDCl<sub>3</sub>, 400 MHz): δH 7.58 (*d*; *J*=15.90 Hz; 1H), 6.74 (*s*; 2H), 6.34 (*d*; *J*=15.90 Hz; 1H), 4.16 (*t*; *J*=6.73 Hz; 2H), 3.87 (*s*; 9H), 1.74-1.67 (*m*; 2H), 0.99 (*t*; *J* = 7.41 Hz; 3H); <sup>13</sup>C NMR(CDCl<sub>3</sub>, 100 MHz): δC 167.2, 153.5, 144.7, 140.2,

130.1, 117.6, 105.3, 66.3, 61.0, 56.2, 22.2, 10.6 [1]

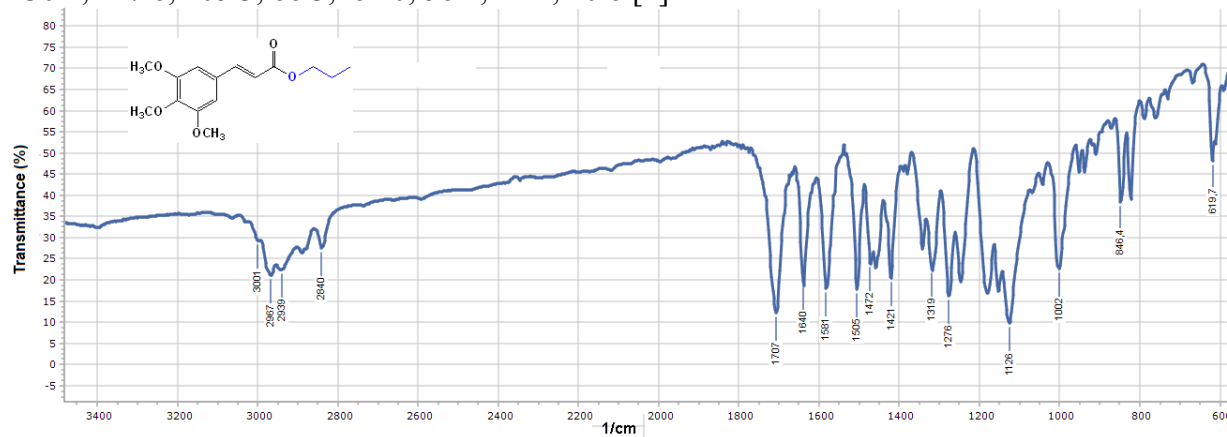

**Figure S7:** Infrared spectrum (KBr,  $\text{cm}^{-1}$ ) of (*E*)-propyl 3-(3,4,5-trimethoxyphenyl)acrylate (**03**).

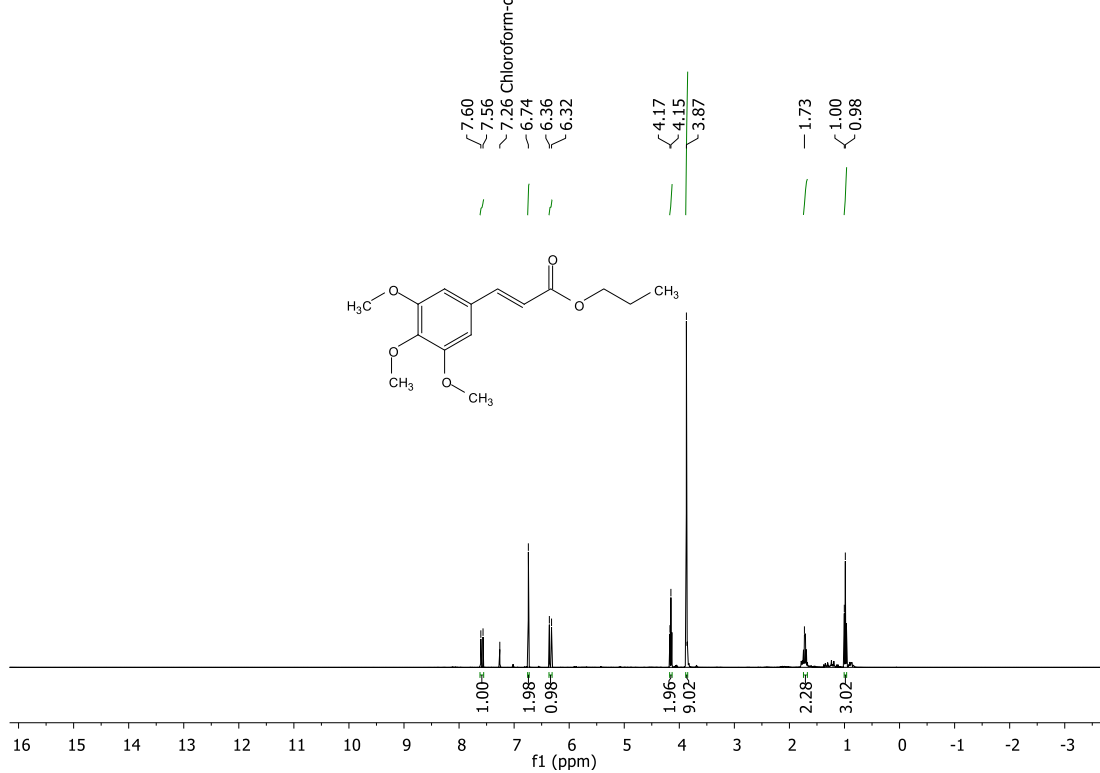

**Figure S8:**  $^1\text{H}$  NMR spectrum (400 MHz,  $\text{CDCl}_3$ ) of (*E*)-propyl 3-(3,4,5-trimethoxyphenyl)acrylate (**03**).

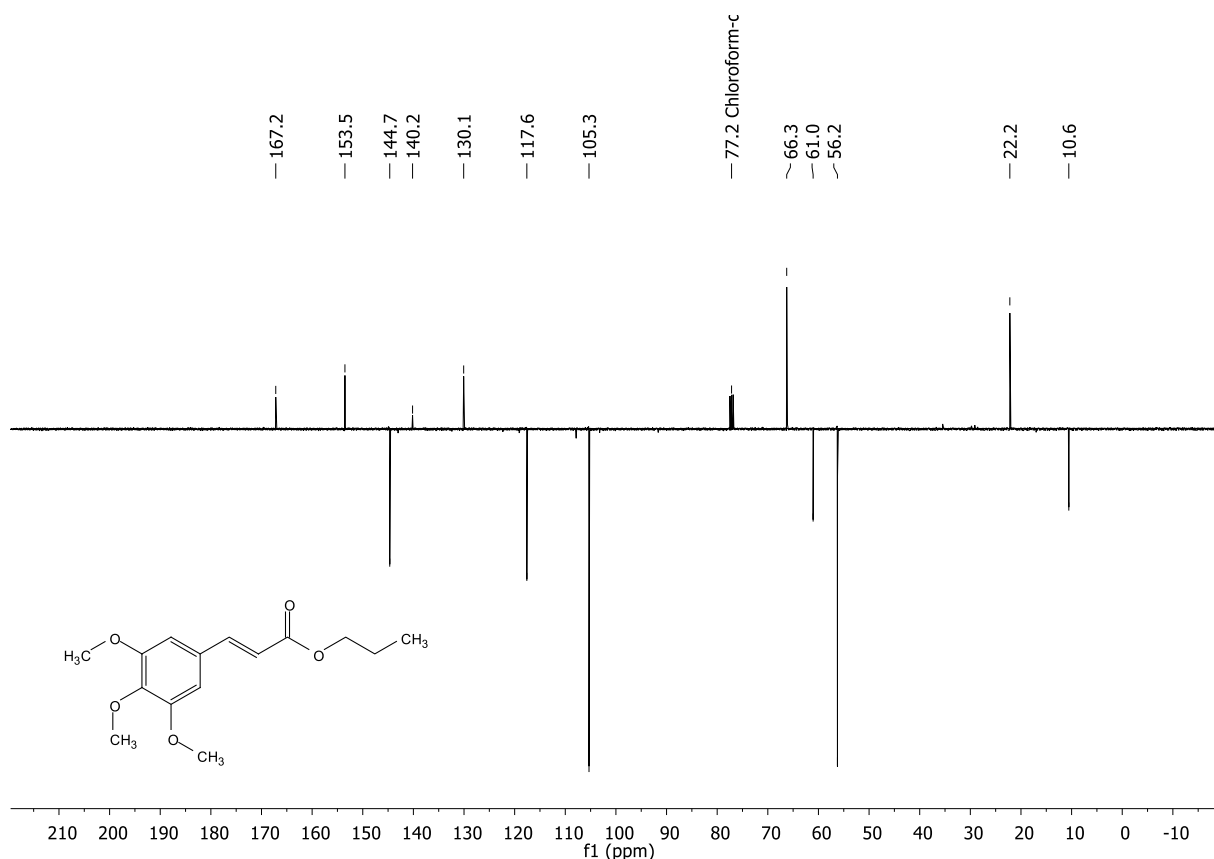

**Figure S9:** APT-<sup>13</sup>C NMR spectrum (100 MHz, CDCl<sub>3</sub>) of (*E*)-propyl 3-(3,4,5-trimethoxyphenyl)acrylate (**03**).

(*E*)-isopropyl 3-(3,4,5-trimethoxyphenyl)acrylate (**4**): brown oil; Yield: 58,8%; Reaction time: 24 h; TLC (7:3 Hex/EtOAc), *R<sub>f</sub>* = 0.60; IR  $\nu_{\text{max}}$  (KBr, cm<sup>-1</sup>): 2982, 2941, 2844, 1706, 1636, 1583, 1506, 1467, 1276, 1128, 828; <sup>1</sup>H NMR (CDCl<sub>3</sub>, 400 MHz):  $\delta$ H 7.57 (*d*; *J*=15.89 Hz; 1H), 6.74 (*s*; 2H), 6.32 (*d*; *J*=15.89 Hz, 1H), 5.16 – 5.10 (*m*, 1H), 3.87 (*s*, 9H), 1.31 (*d*, *J*=6.26 Hz, 6H); <sup>13</sup>C NMR (CDCl<sub>3</sub>, 100 MHz):  $\delta$ C 166.6, 153.5, 144.4, 140.1, 130.2, 118.2, 105.3, 67.9, 61.1, 56.3, 22.1 [3].

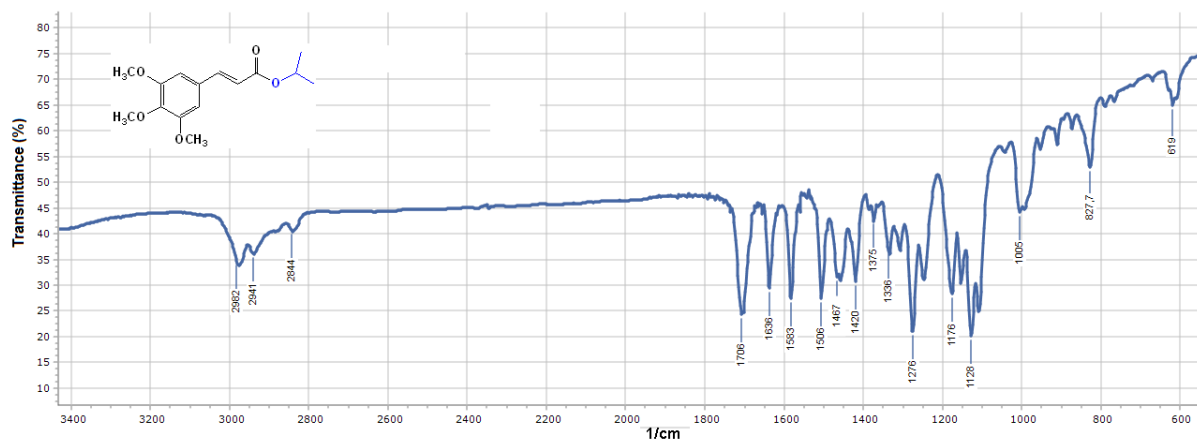

**Figure S10:** Infrared spectrum (KBr, cm<sup>-1</sup>) of (*E*)-isopropyl 3-(3,4,5-trimethoxyphenyl)acrylate (**04**).

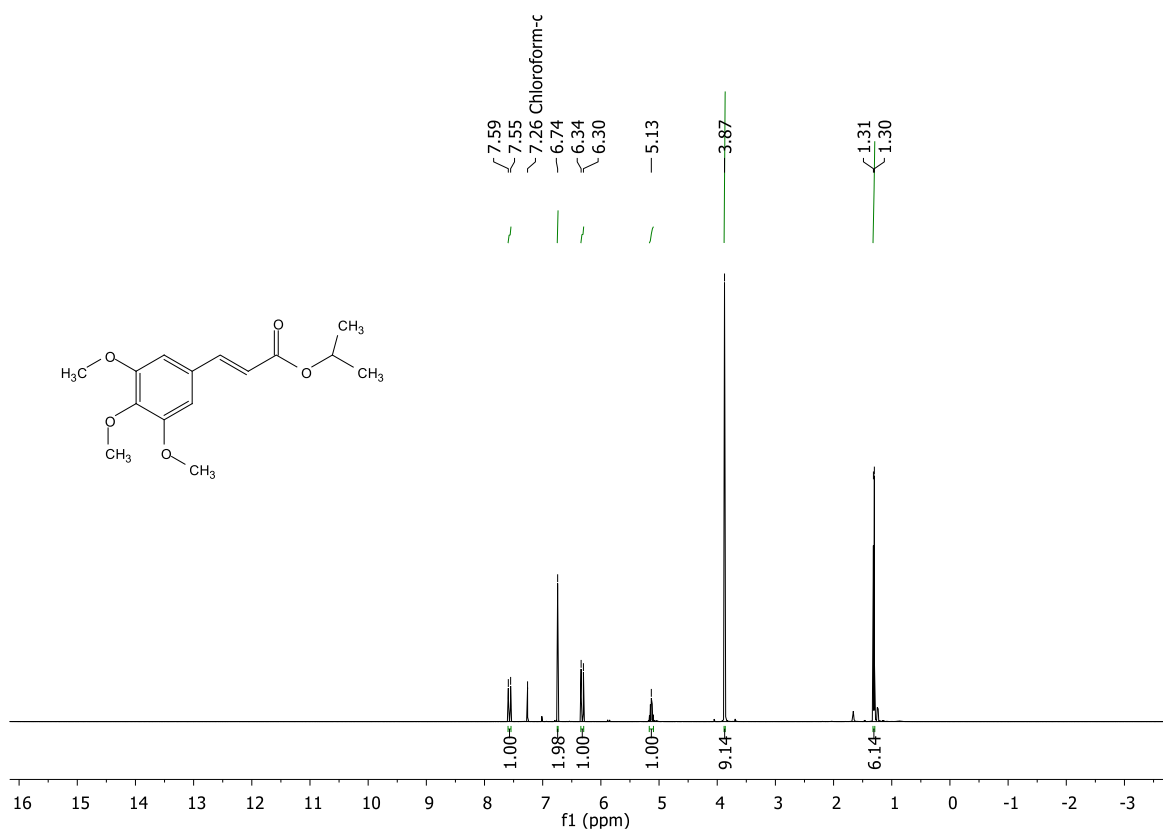

**Figure S11:** <sup>1</sup>H NMR spectrum (400 MHz, CDCl<sub>3</sub>) of *(E)*-isopropyl 3-(3,4,5-trimethoxyphenyl)acrylate (**4**).

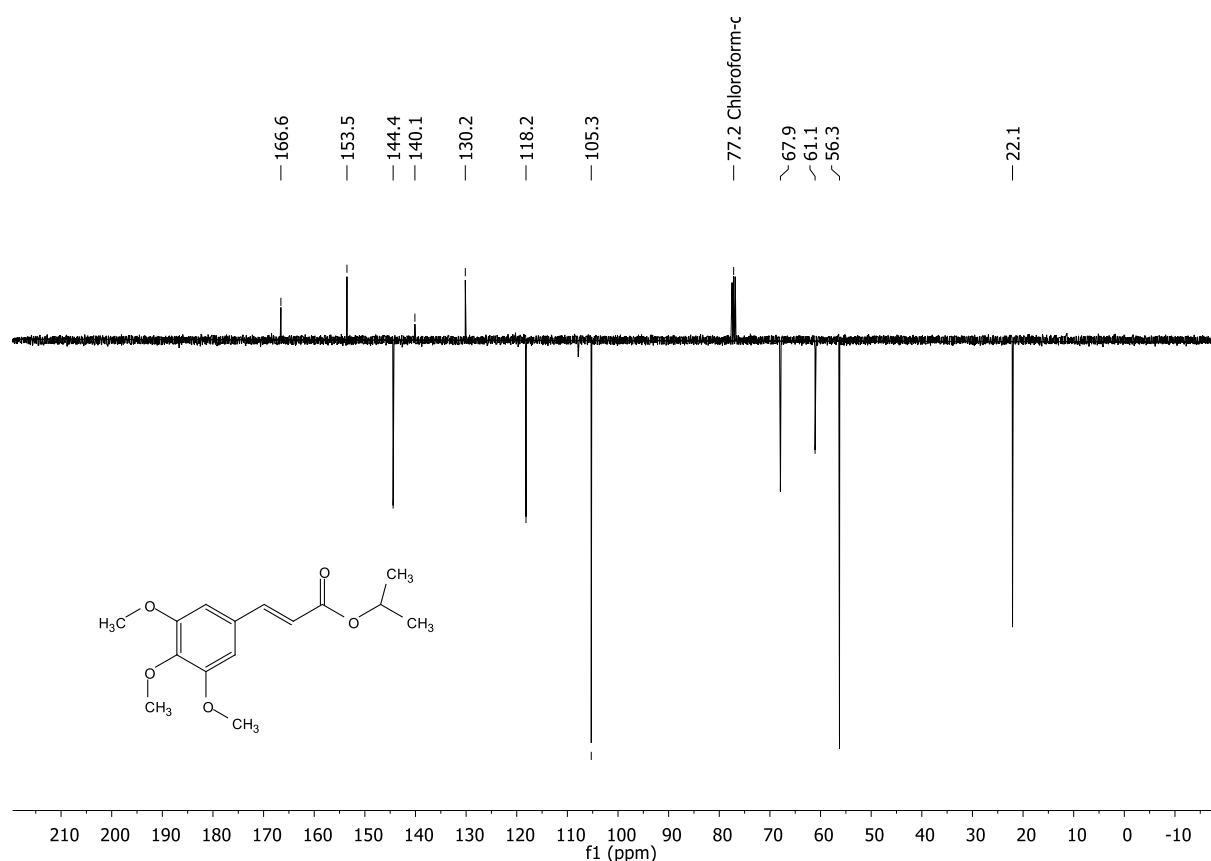

**Figure S12:** APT-<sup>13</sup>C NMR spectrum (100 MHz, CDCl<sub>3</sub>) of *(E)*-isopropyl 3-(3,4,5-trimethoxyphenyl)acrylate (**4**).

*(E)*-pentyl 3-(3,4,5-trimethoxyphenyl)acrylate (**5**): white solid; Yield: 41.9%; Reaction time: 48 h; m.p.: 104-105°C (lit. 105-106°C); TLC (7:3, Hex/EtOAc), R<sub>f</sub> = 0.65; IR ν<sub>max</sub> (KBr, cm<sup>-1</sup>): 3006, 2933, 2857, 1707, 1636, 1583, 1508, 1461, 1275, 1127, 820; <sup>1</sup>H NMR (CDCl<sub>3</sub>, 500 MHz): δH 7.57 (*d*; *J*=15.89 Hz; 1H), 6.74 (*s*; 2H), 6.33 (*d*; *J*=15.89 Hz; 1H), 4.18 (*t*; *J*= 6.70 Hz; 2H), 3.87 (*s*;

9H), 1.71 – 1.66 (*m*; 2H), 1.40 – 1.33 (*m*; 4H), 0.91 (*t*; *J*=6.25 Hz; 3H); <sup>13</sup>C NMR (CDCl<sub>3</sub>, 125 MHz): δC 167.1, 153.5, 144.6, 140.2, 130.1, 117.6, 105.3, 64.8, 61.0, 56.2, 28.5, 28.2, 22.4, 14.0 [3].

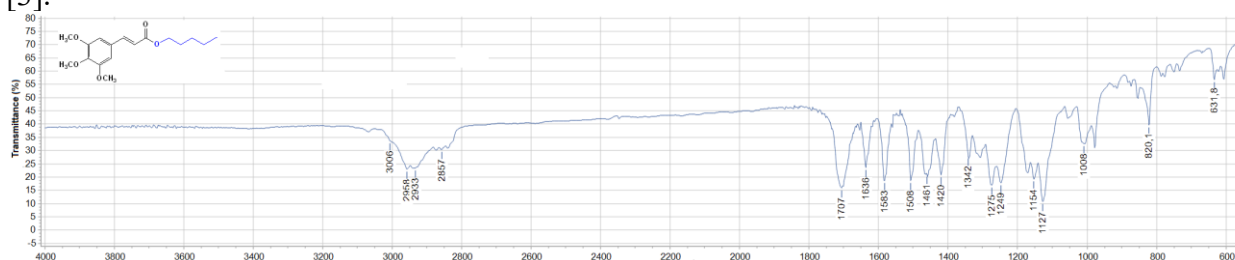

**Figure S13:** Infrared spectrum (KBr, cm<sup>-1</sup>) of (*E*)-pentyl 3-(3,4,5-trimethoxyphenyl)acrylate (**05**).

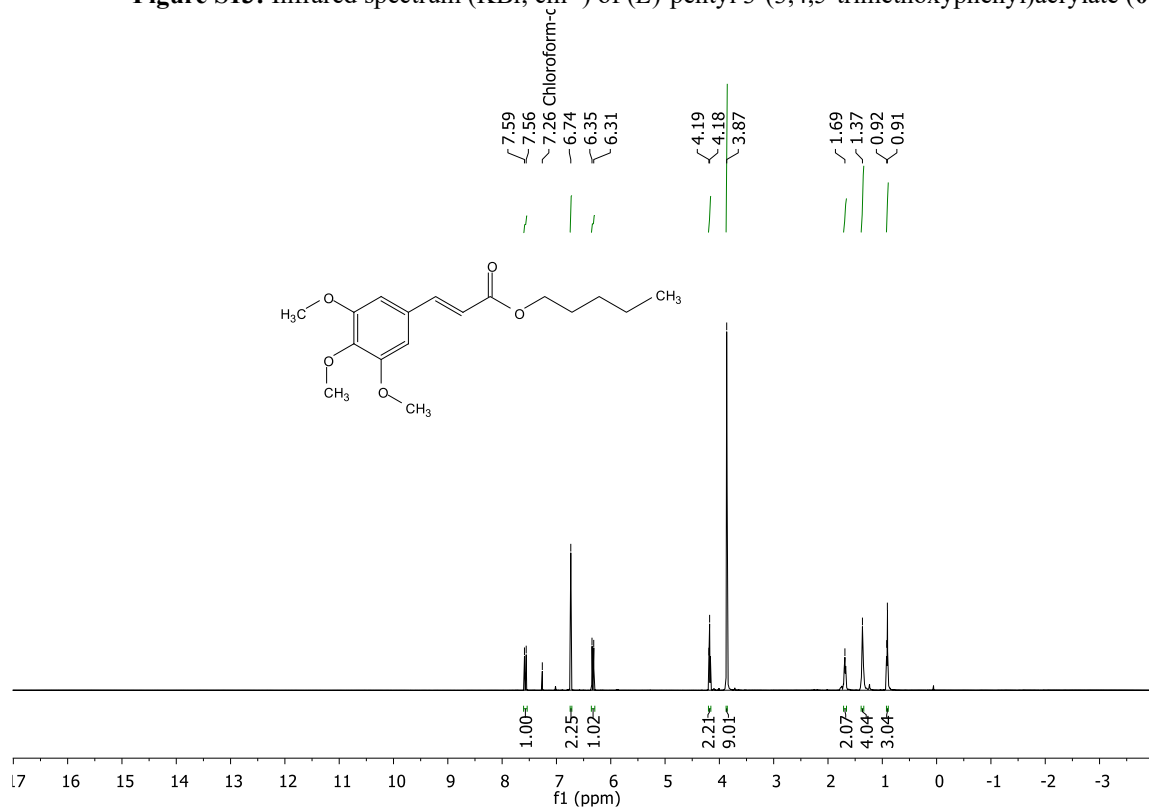

**Figure S14:** <sup>1</sup>H NMR spectrum (500 MHz, CDCl<sub>3</sub>) of (*E*)-pentyl 3-(3,4,5-trimethoxyphenyl)acrylate (**05**).



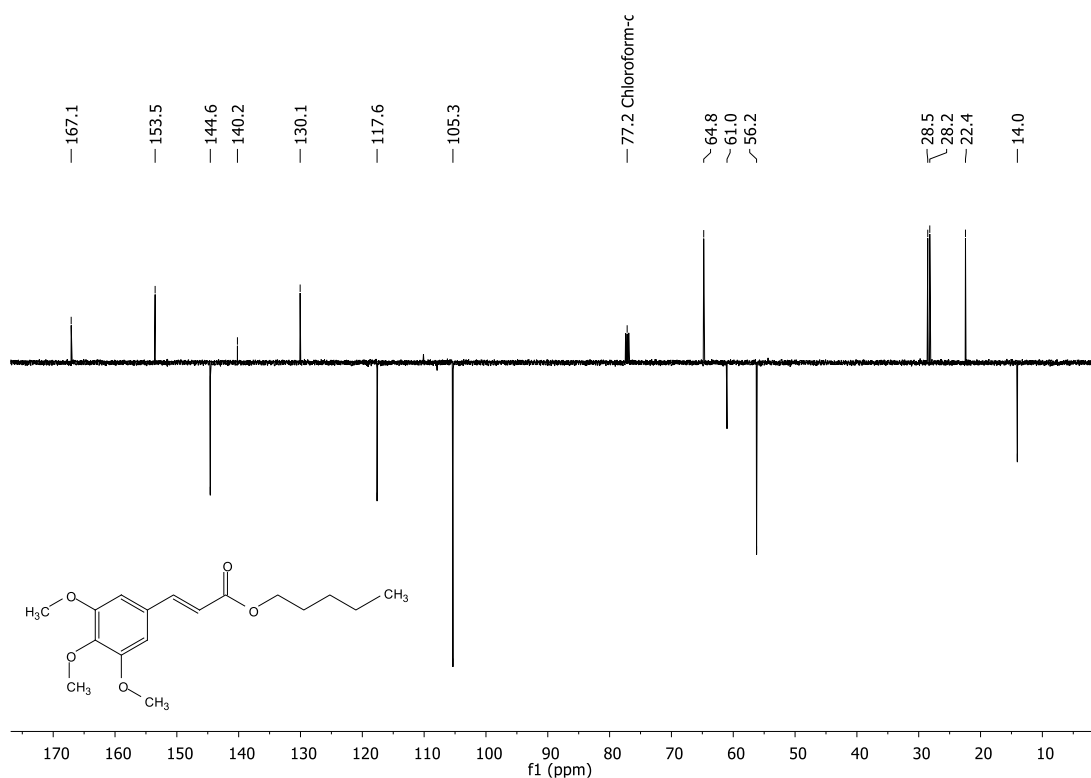

**Figure S15:** APT- $^{13}\text{C}$  NMR spectrum (125 MHz,  $\text{CDCl}_3$ ) of (*E*)-pentyl 3-(3,4,5-trimethoxyphenyl)acrylate (**05**).

(*E*)-decyl 3-(3,4,5-trimethoxyphenyl)acrylate (**6**): white solid; Yield: 38.0%; Reaction time: 48 h; m.p.: 35-36°C (lit. 37-38°C); TLC (7:3 Hex/EtOAc),  $R_f$  = 0.70; IR  $\nu_{\text{max}}$  (KBr,  $\text{cm}^{-1}$ ): 3001, 2925, 2857, 1714, 1638, 1584, 1508, 1276, 1126, 824;  $^1\text{H}$  NMR ( $\text{CDCl}_3$ , 400 MHz):  $\delta_{\text{H}}$  7.58 (*d*;  $J$ =15.90 Hz; 1H), 6.74 (*s*; 2H), 6.34 (*d*;  $J$ =15.90 Hz; 1H), 4.20 (*t*;  $J$ =6.74 Hz; 2H), 3.87 (*s*; 9H), 1.73 – 1.66 (*m*; 2H), 1.40 – 1.26 (*m*; 14H), 0.87 (*t*;  $J$ = 6.61 Hz; 3H)  $^{13}\text{C}$  NMR ( $\text{CDCl}_3$ , 100 MHz):  $\delta_{\text{C}}$  167.2, 153.6, 144.7, 140.2, 130.1, 117.7, 105.4, 64.9, 61.1, 56.3, 32.1, 29.7, 29.5, 28.9, 26.2, 22.8, 14.3 [3].

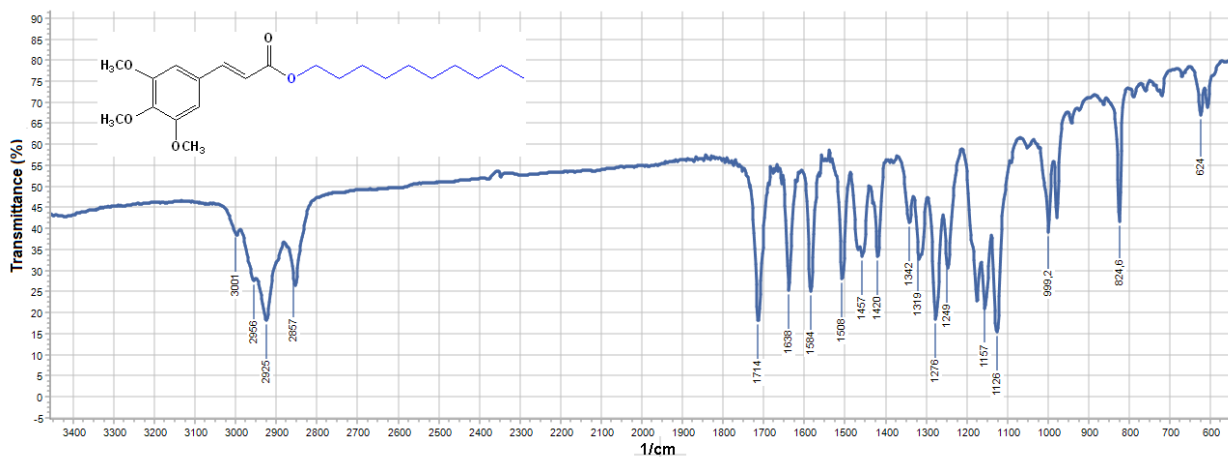

**Figure S16:** Infrared spectrum (KBr,  $\text{cm}^{-1}$ ) of (*E*)-decyl 3-(3,4,5-trimethoxyphenyl)acrylate (**06**).

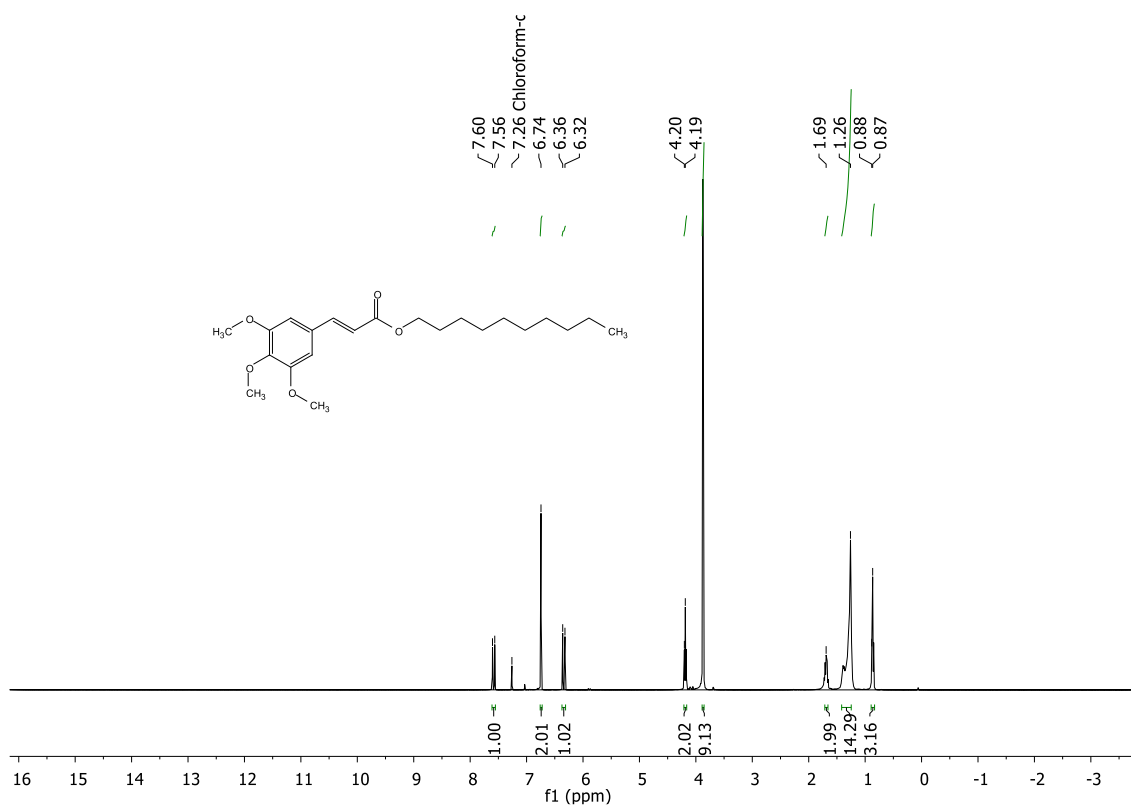

Figure S17: <sup>1</sup>H NMR spectrum (400 MHz, CDCl<sub>3</sub>) of (E)-decyl 3-(3,4,5-trimethoxyphenyl)acrylate (06).

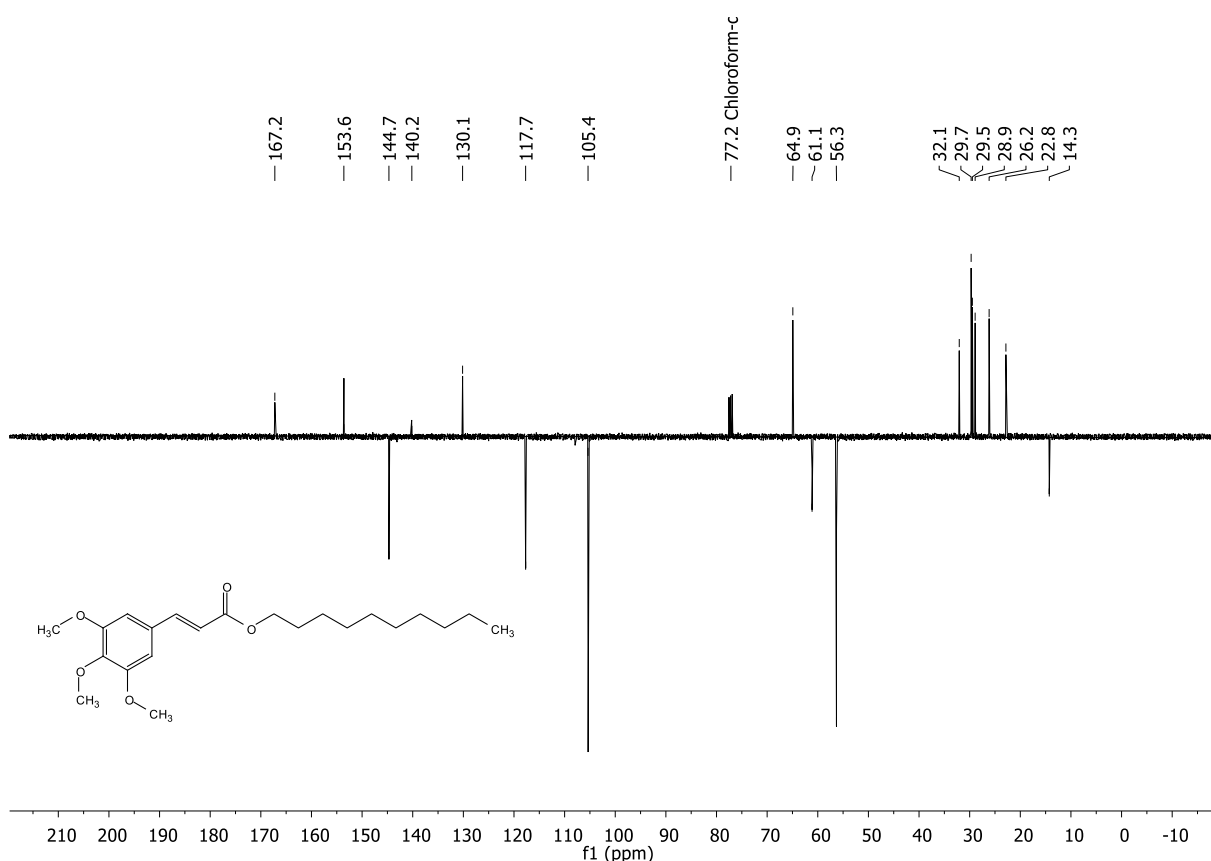

Figure S18: APT-<sup>13</sup>C NMR spectrum (100 MHz, CDCl<sub>3</sub>) of (E)-decyl 3-(3,4,5-trimethoxyphenyl)acrylate (06).

(E)-4-methoxybenzyl 3-(3,4,5-trimethoxyphenyl)acrylate (7): white solid; Yield: 47.5%; Reaction time: 48 h; m.p.: 70-71°C (lit. 65-67°C); TLC (7:3 Hex/EtOAc), R<sub>f</sub> = 0.58; IR ν<sub>max</sub> (KBr, cm<sup>-1</sup>): 3036, 2942, 2838, 1718, 1640, 1582, 1515, 1467, 1278, 1133, 817; <sup>1</sup>H NMR (CDCl<sub>3</sub>, 500 MHz): δH 7.61 (*d*; *J*=15.92 Hz; 1H), 7.35 (*d*; *J*= 8.67; 2H), 6.91 (*d*; *J*= 8.67; 2H), 6.73 (*s*; 2H), 6.37 (*d*; *J*=15.92 Hz; 1H), 5.18 (*s*; 2H), 3.87 (*s*; 9H), 3.81 (*s*; 3H); <sup>13</sup>C NMR (CDCl<sub>3</sub>, 125 MHz): δC

166.9, 159.8, 153.6, 145.1, 140.3, 130.3, 130.0, 128.3, 117.4, 114.1, 105.4, 66.4, 61.1, 56.3, 55.5 [4].

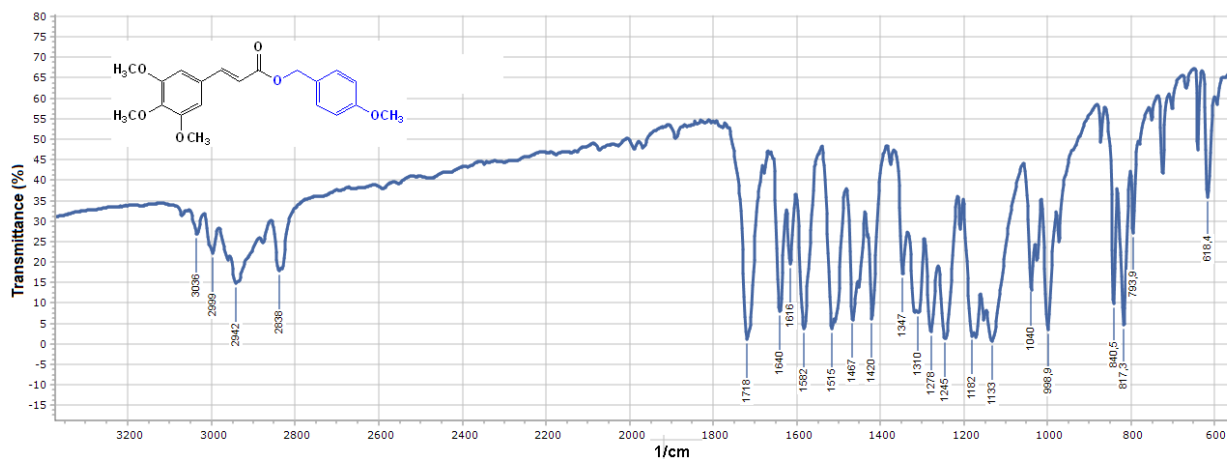

**Figure S19:** Infrared spectrum (KBr, cm<sup>-1</sup>) of (*E*)-4-methoxybenzyl 3-(3,4,5-trimethoxyphenyl)acrylate (**07**).

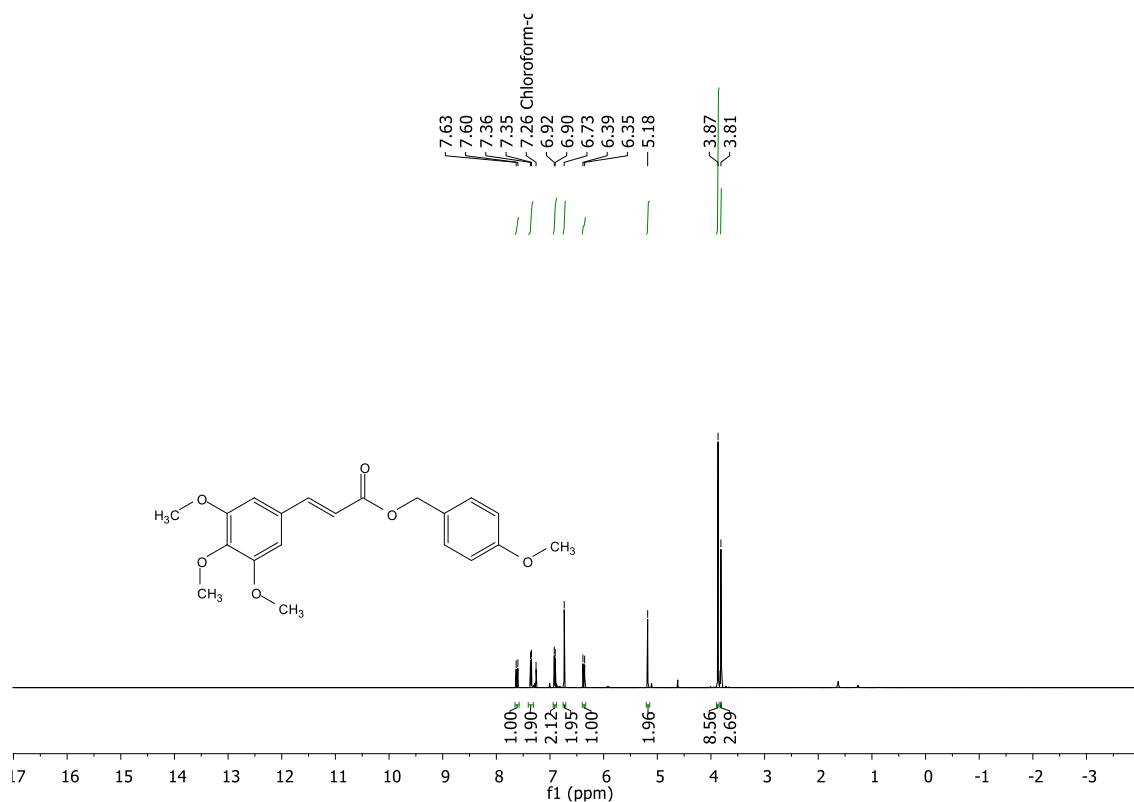

**Figure S20:** <sup>1</sup>H NMR spectrum (500 MHz, CDCl<sub>3</sub>) of (*E*)-4-methoxybenzyl 3-(3,4,5-trimethoxyphenyl)acrylate (**07**).

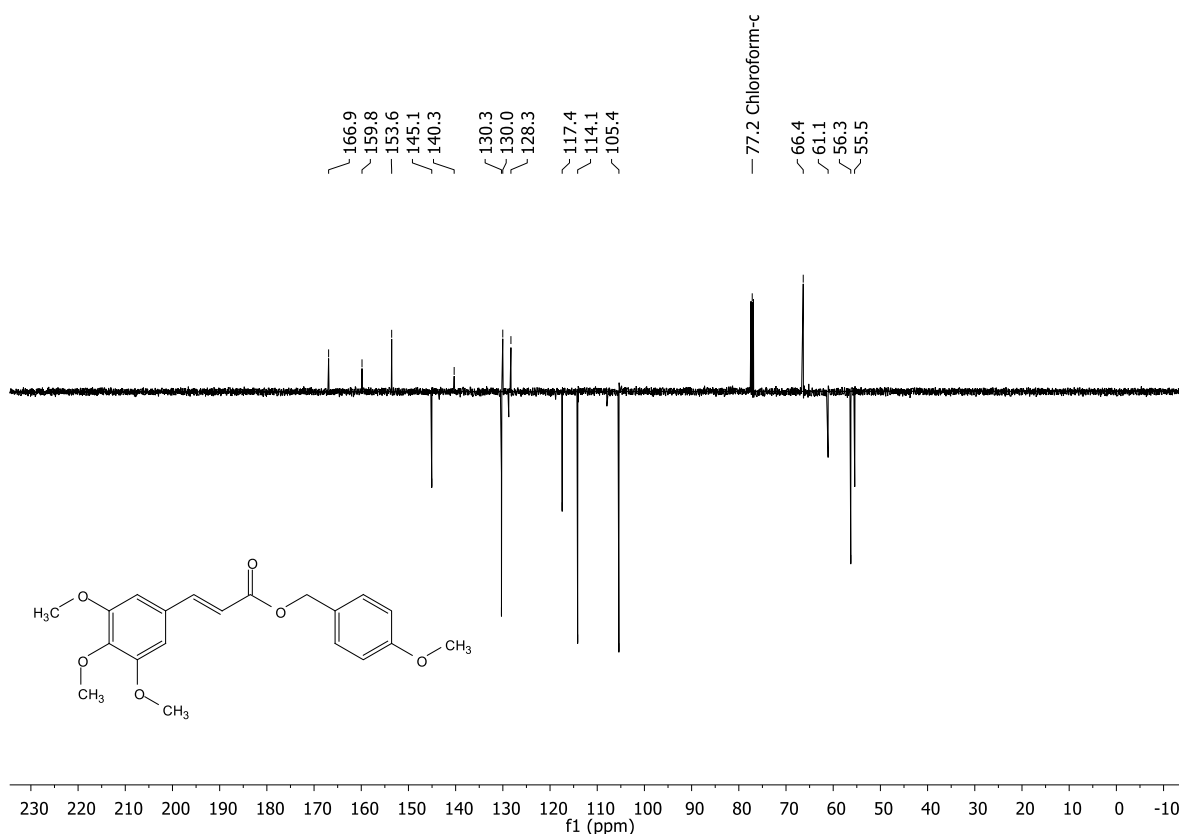

**Figure S21:** APT- $^{13}\text{C}$  NMR spectrum (125 MHz,  $\text{CDCl}_3$ ) of (*E*)-4-methoxybenzyl 3-(3,4,5-trimethoxyphenyl)acrylate (**07**).

(*E*)-3-methoxybenzyl 3-(3,4,5-trimethoxyphenyl)acrylate (**8**): colorless oil; Yield: 26.7%; Reaction time: 48 h; TLC (7:3 Hex/EtOAc),  $R_f$  = 0.58; IR  $\nu_{\text{max}}$  (KBr,  $\text{cm}^{-1}$ ): 3002, 2939, 2840, 1713, 1636, 1584, 1505, 1459, 1278, 1136, 846;  $^1\text{H}$  NMR ( $\text{CDCl}_3$ , 400 MHz):  $\delta$  7.64 (*d*;  $J$ =15.90 Hz; 1H), 7.31 (*t*;  $J$ = 7.9 Hz; 1H), 7.02 – 6.95 (*m*; 2H), 6.90 – 6.86 (*m*; 1H), 6.75 (*s*; 2H), 6.40 (*d*;  $J$ =15.90 Hz; 1H), 5.22 (*s*; 2H), 3.88 (*s*; 9H), 3.83 (*s*; 3H);  $^{13}\text{C}$  NMR ( $\text{CDCl}_3$ , 100 MHz):  $\delta$  166.8, 159.9, 153.6, 145.3, 140.3, 137.7, 130.0, 129.8, 120.6, 117.2, 114.0, 113.8, 105.4, 66.4, 61.1, 56.2, 55.4. HRMS (MALDI TOF/TOF) calculated for  $\text{C}_{20}\text{H}_{22}\text{O}_6$   $m/z$  [ $\text{M}$ ] $^+$ : 358.1416, found 358,1416.

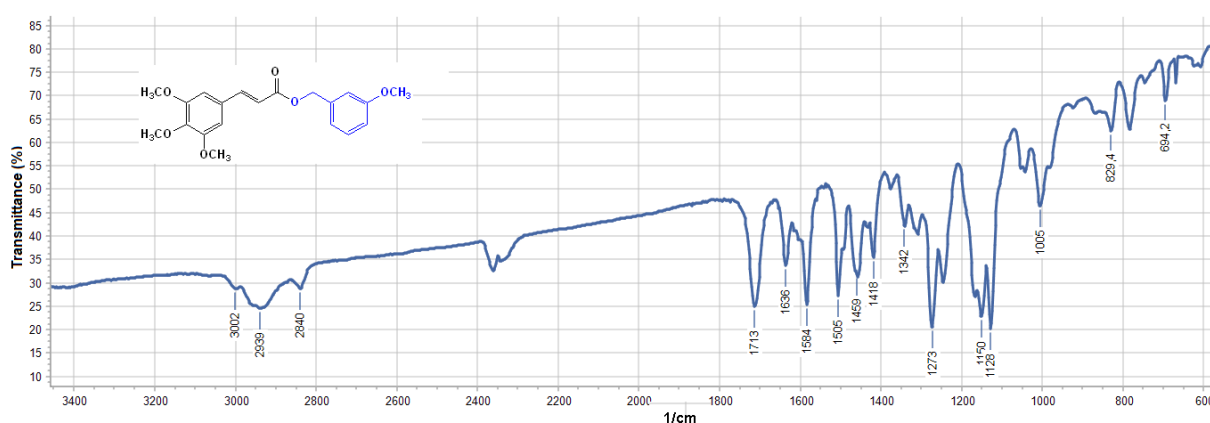

**Figure S22:** Infrared spectrum (KBr,  $\text{cm}^{-1}$ ) of (*E*)-3-methoxybenzyl 3-(3,4,5-trimethoxyphenyl)acrylate (**08**).

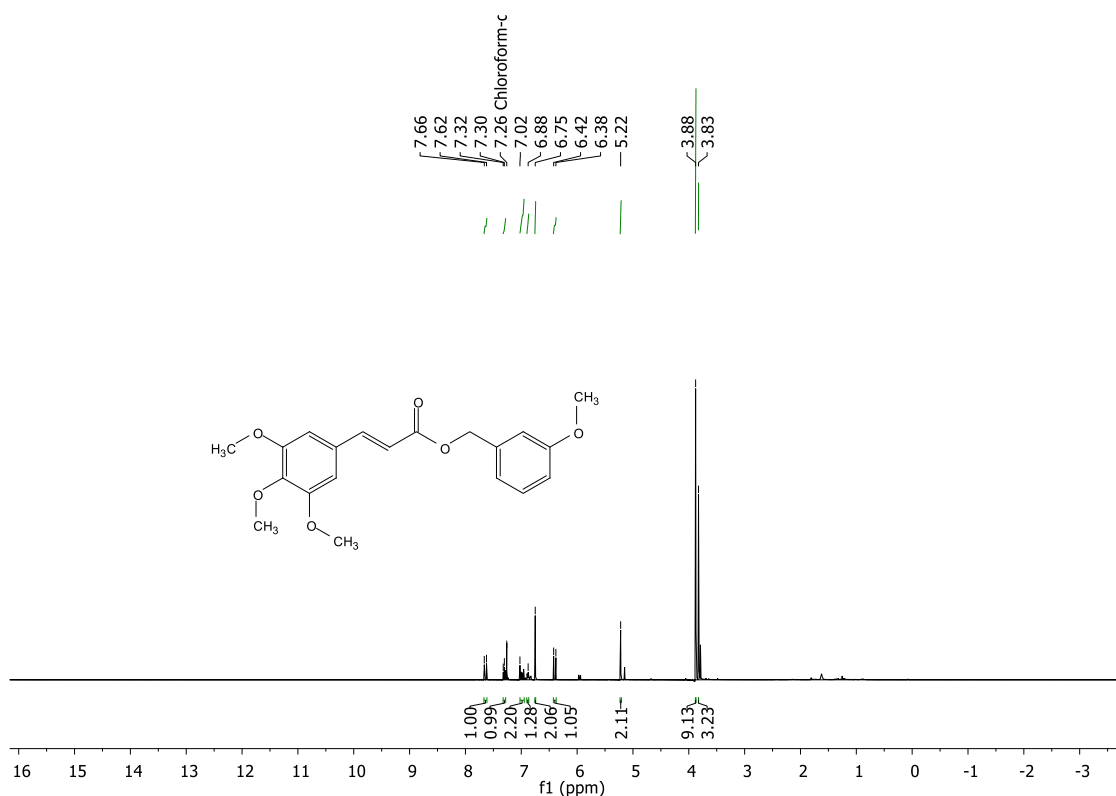

**Figure S23:** <sup>1</sup>H NMR spectrum (400 MHz, CDCl<sub>3</sub>) of (E)-3-methoxybenzyl 3-(3,4,5-trimethoxyphenyl)acrylate (08).

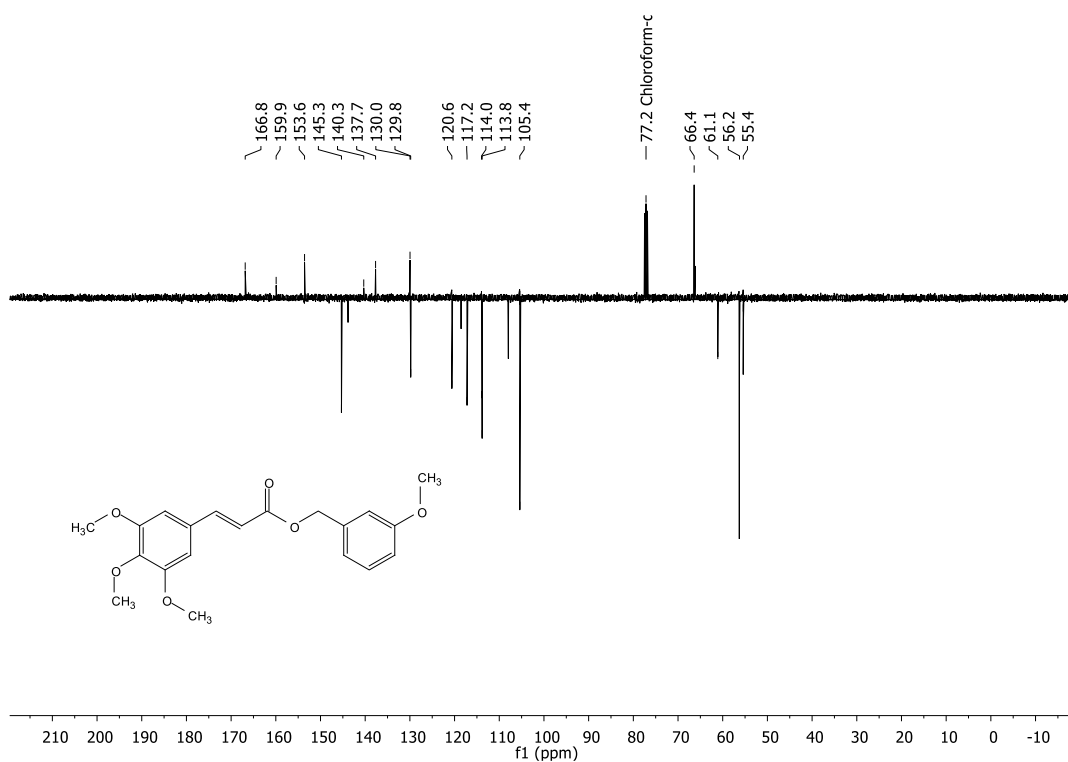

**Figure S24:** APT-<sup>13</sup>C NMR spectrum (100 MHz, CDCl<sub>3</sub>) of (E)-3-methoxybenzyl 3-(3,4,5-trimethoxyphenyl)acrylate (08).

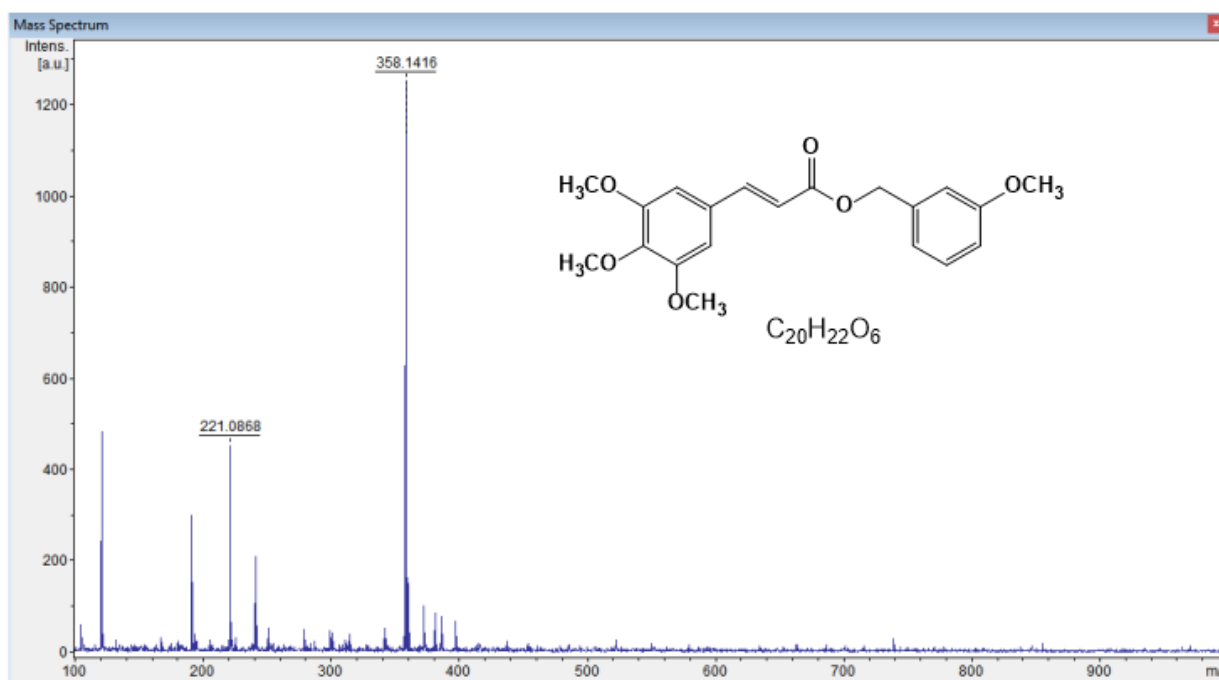

**Figure S25:** HRMS spectrum (MALDI TOF/TOF) of (*E*)-3-methoxybenzyl 3-(3,4,5-trimethoxyphenyl)acrylate (**08**).

(*E*)-4-methylbenzyl 3-(3,4,5-trimethoxyphenyl)acrylate (**9**): colorless oil; Yield: 62.8%; Reaction time: 24 h; TLC (7:3 Hex/EtOAc),  $R_f$  = 0.62; IR  $\nu_{\text{max}}$  (KBr,  $\text{cm}^{-1}$ ): 3010, 2932, 2837, 1716, 1640, 1582, 1509, 1465, 1278, 1136, 846;  $^1\text{H}$  NMR ( $\text{CDCl}_3$ , 500 MHz):  $\delta$  7.63 (*d*;  $J$  = 15.92 Hz; 1H), 7.31 (*d*;  $J$  = 7.98 Hz; 2H), 7.19 (*d*;  $J$  = 7.82 Hz; 2H), 6.74 (*s*; 2H), 6.38 (*d*;  $J$  = 15.92 Hz; 1H), 5.21 (*s*; 2H), 3.87 (*s*; 9H), 2.36 (*s*; 3H);  $^{13}\text{C}$  NMR ( $\text{CDCl}_3$ , 125 MHz):  $\delta$  166.9, 153.3, 145.1, 140.3, 138.3, 133.1, 130.0, 129.4, 128.6, 117.4, 105.4, 66.5, 61.1, 56.3, 21.3. HRMS (MALDI TOF/TOF) calculated for  $\text{C}_{20}\text{H}_{22}\text{O}_5$   $m/z$  [ $\text{M}$ ] $^+$ : 342.1467, found 342.1475.

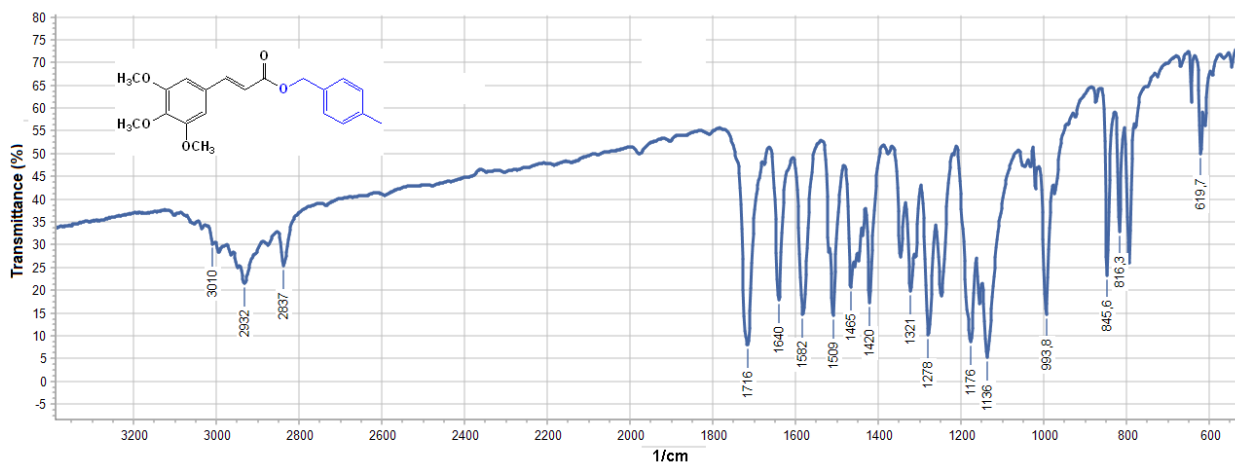

**Figure S26:** Infrared spectrum (KBr,  $\text{cm}^{-1}$ ) of (*E*)-4-methylbenzyl 3-(3,4,5-trimethoxyphenyl)acrylate (**09**).

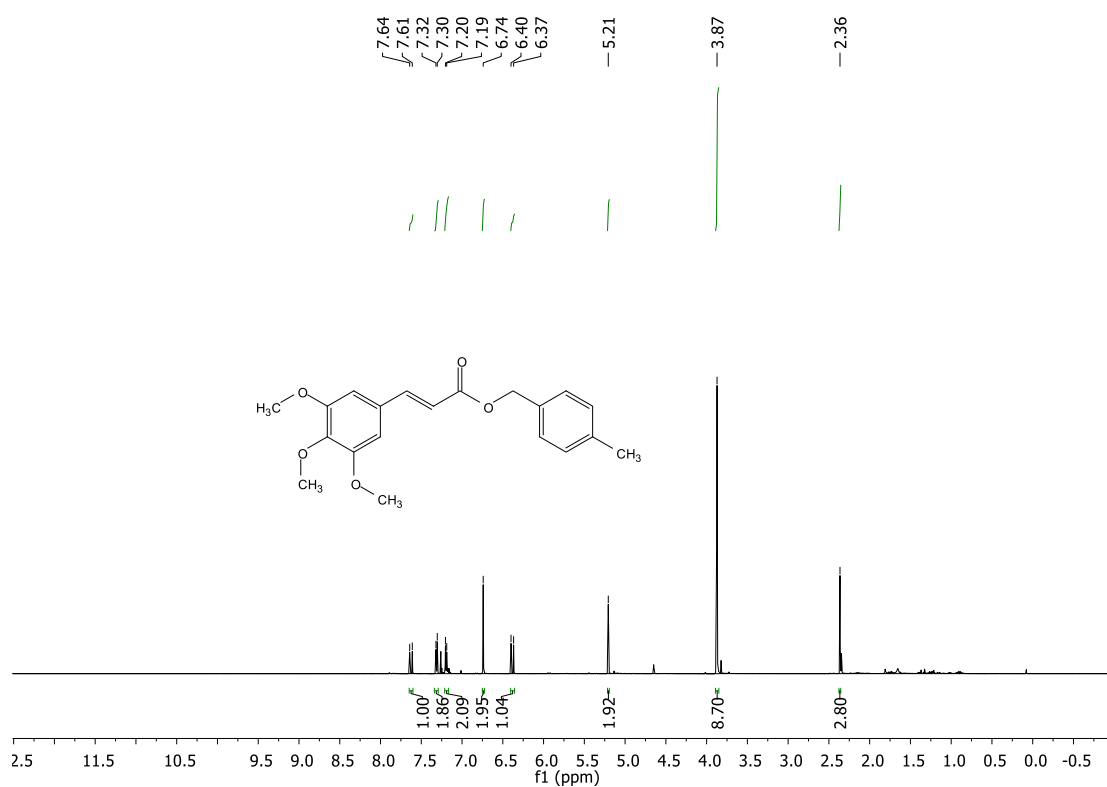

**Figure S27:** <sup>1</sup>H NMR spectrum (500 MHz, CDCl<sub>3</sub>) of (*E*)-4-methylbenzyl 3-(3,4,5-trimethoxyphenyl)acrylate (**09**).

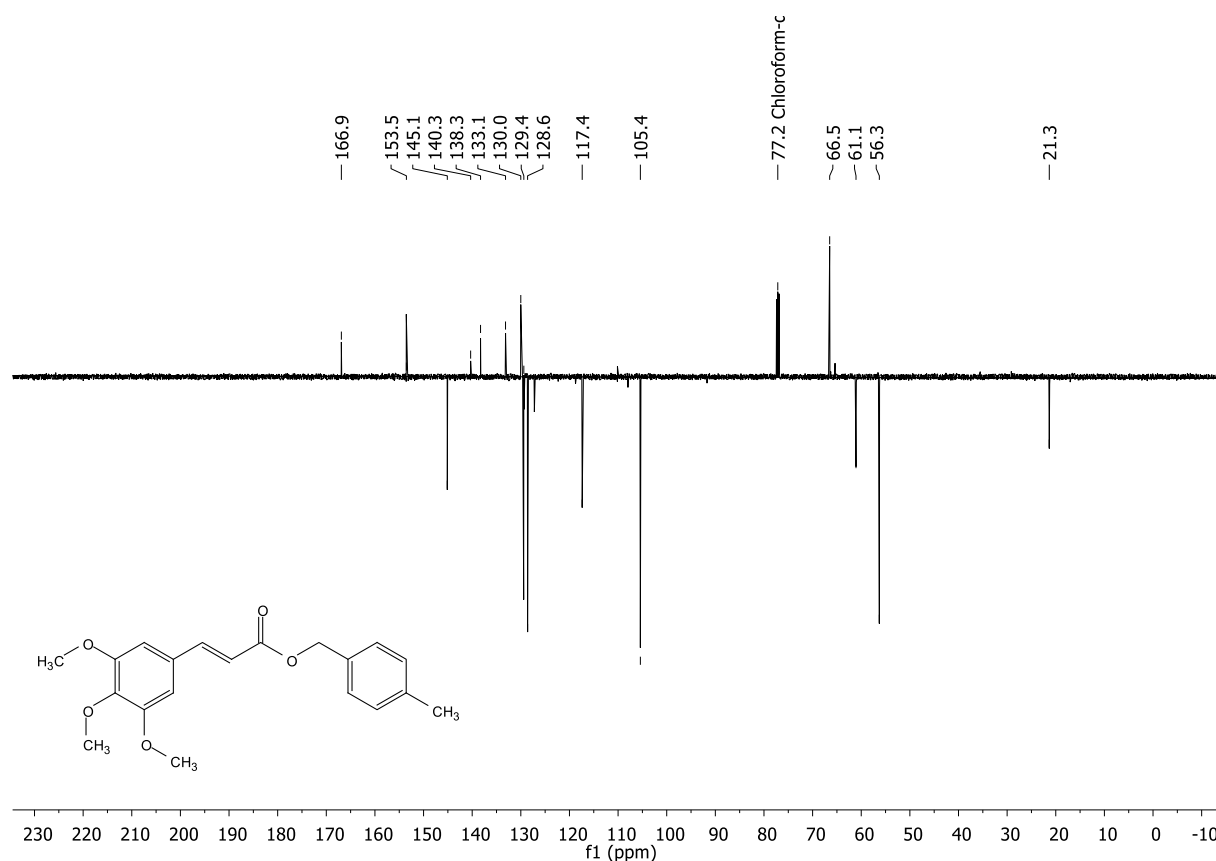

**Figure S28:** APT-<sup>13</sup>C NMR spectrum (125 MHz, CDCl<sub>3</sub>) of (*E*)-4-methylbenzyl 3-(3,4,5-trimethoxyphenyl)acrylate (**09**).

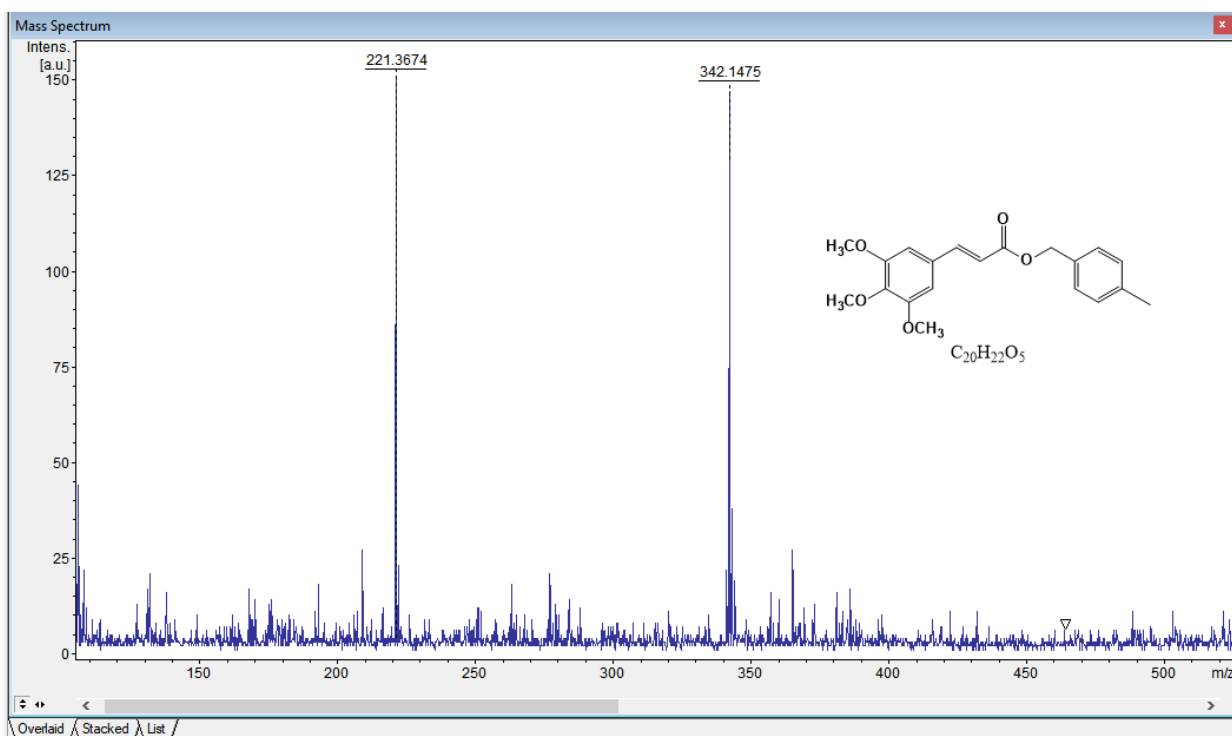

**Figure S29:** HRMS spectrum (MALDI TOF/TOF) of (*E*)-4-methylbenzyl 3-(3,4,5-trimethoxyphenyl)acrylate (**9**).

(*E*)-benzyl 3-(3,4,5-trimethoxyphenyl)acrylate (**10**): white solid; Yield: 48.6%; Reaction time: 24 h; m.p.: 82–83°C (lit. 85–86°C); TLC (7:3 Hex/EtOAc),  $R_f$  = 0.55; IR  $\nu_{max}$  (KBr,  $cm^{-1}$ ): 3021, 2935, 2842, 1704, 1638, 1582, 1506, 1472, 1276, 1127, 827;  $^1H$  NMR ( $CDCl_3$ , 400 MHz):  $\delta$  7.64 (*d*;  $J$ =15.90 Hz; 1H), 7.43 – 7.37 (*m*; 5H), 6.75 (*s*; 2H), 6.40 (*d*;  $J$ =15.90 Hz; 1H), 5.25 (*s*; 2H), 3.88 (*s*; 9H);  $^{13}C$  NMR ( $CDCl_3$ , 100 MHz):  $\delta$  166.8, 153.5, 145.2, 140.2, 136.1, 129.9, 128.6, 128.3, 127.0, 117.1, 105.3, 66.4, 61.0, 56.2 [5]

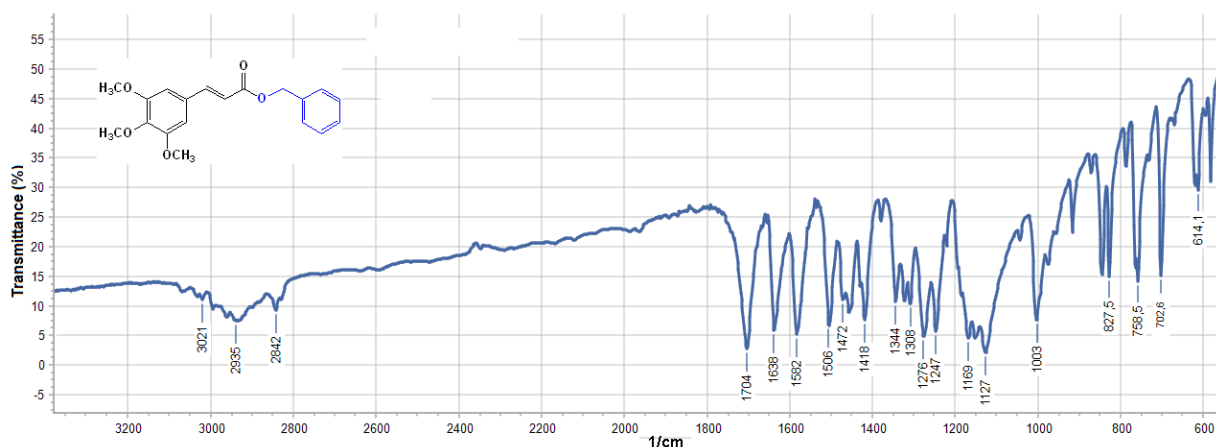

**Figure S30:** Infrared spectrum (KBr,  $cm^{-1}$ ) of (*E*)-benzyl 3-(3,4,5-trimethoxyphenyl)acrylate (**10**).



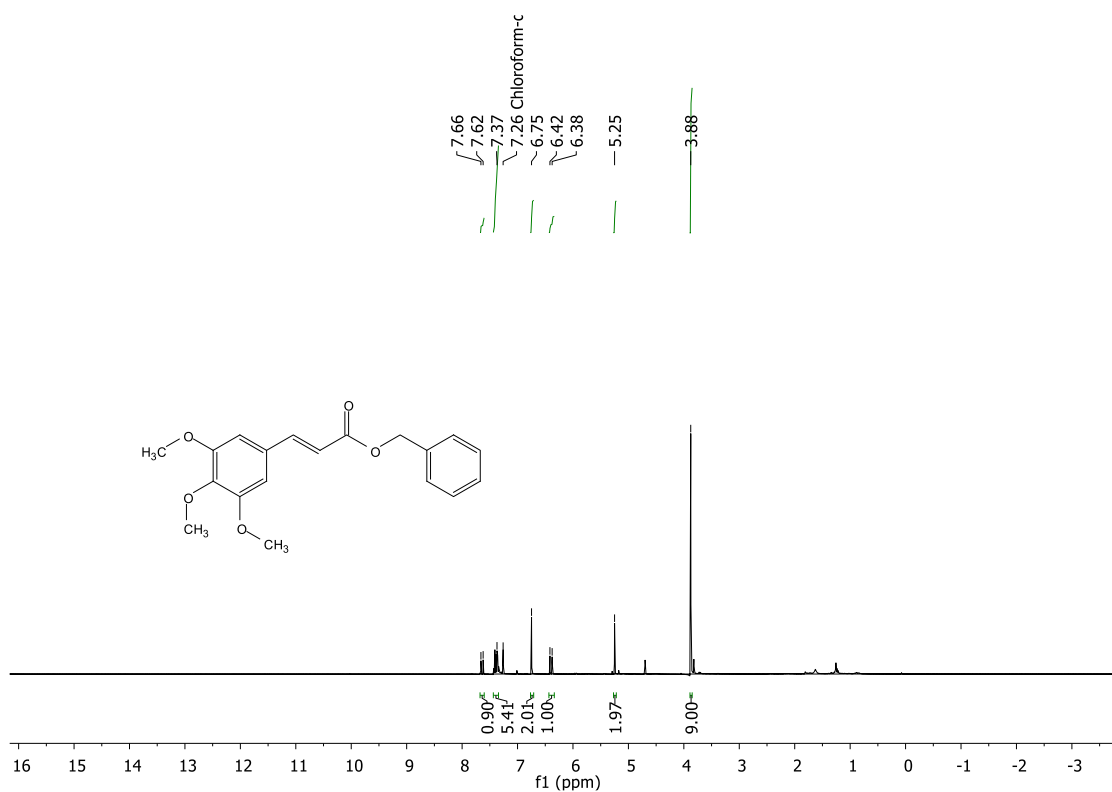

**Figure S31:** <sup>1</sup>H NMR spectrum (400 MHz, CDCl<sub>3</sub>) of *(E)*-benzyl 3-(3,4,5-trimethoxyphenyl)acrylate (10).

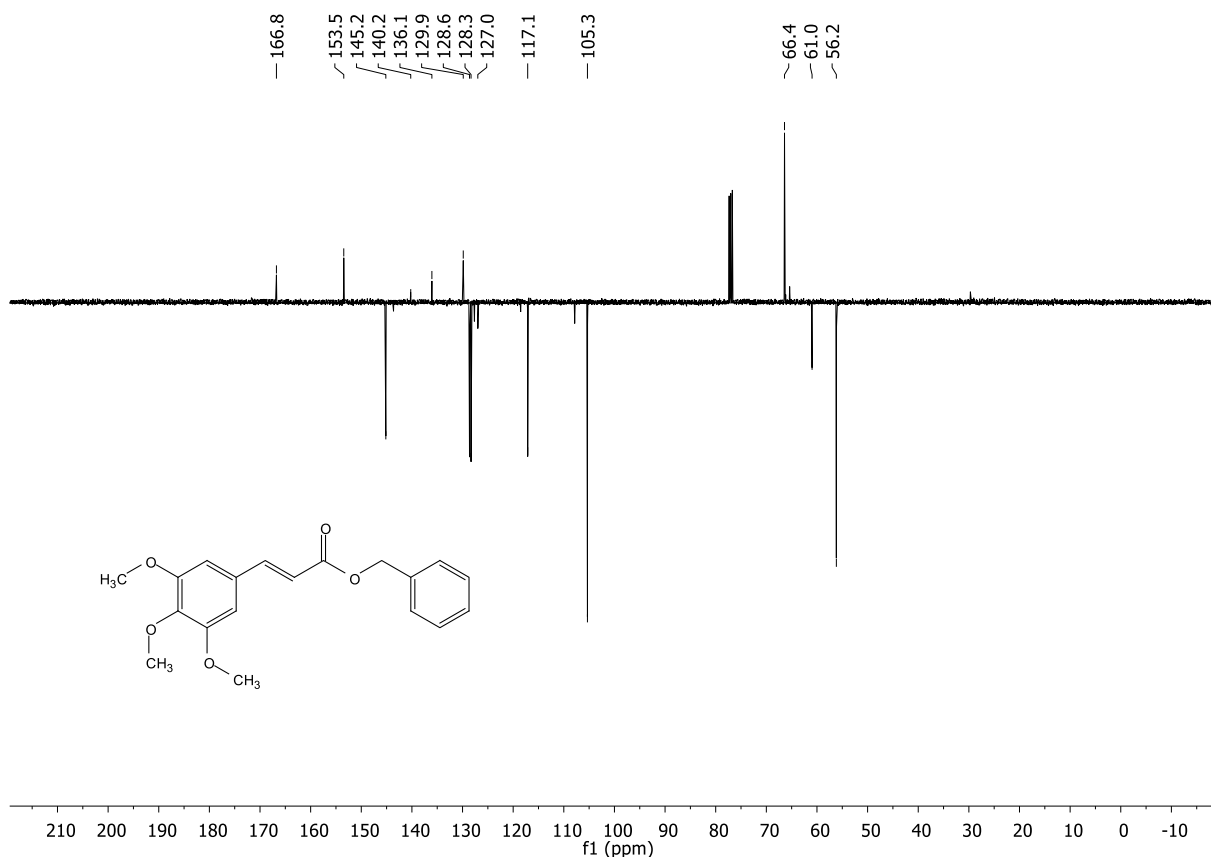

**Figure S32:** APT-<sup>13</sup>C NMR spectrum (100 MHz, CDCl<sub>3</sub>) of *(E)*-benzyl 3-(3,4,5-trimethoxyphenyl)acrylate (10).

*(E)*-furan-2-ylmethyl 3-(3,4,5-trimethoxyphenyl)acrylate (11): brown oil; Yield: 41.2%; Reaction time: 48 h; TLC (7:3 Hex/EtOAc), *R*<sub>f</sub> = 0.60; IR  $\nu_{\text{max}}$  (KBr, cm<sup>-1</sup>): 3002, 2945, 2842, 1713, 1638, 1583, 1505, 1459, 1275, 1127, 827; <sup>1</sup>H NMR (CDCl<sub>3</sub>, 500 MHz):  $\delta$ H 7.62 (*d*; *J*=15.91 Hz; 1H), 7.45 – 7.44 (*m*; 1H), 6.74 (*s*; 2H), 6.46 – 6.45 (*m*; 1H), 6.38 – 6.35 (*m*; 2H), 5.19 (*s*; 2H), 3.86 (*s*; 9H); <sup>13</sup>C NMR (CDCl<sub>3</sub>, 125 MHz):  $\delta$ C 166.6, 153.6, 149.7, 145.5, 143.5, 140.4, 129.9, 116.9, 110.8, 110.7, 105.5, 61.1, 58.3, 56.3 [6].

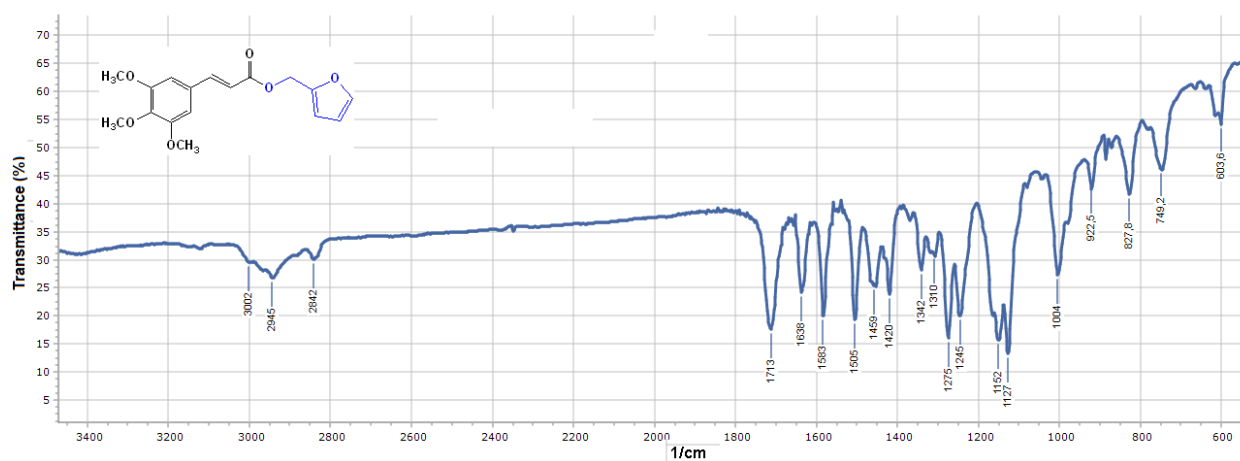

**Figure S33:** Infrared spectrum (KBr,  $\text{cm}^{-1}$ ) of (*E*)-furan-2-ylmethyl 3-(3,4,5-trimethoxyphenyl)acrylate (**11**).

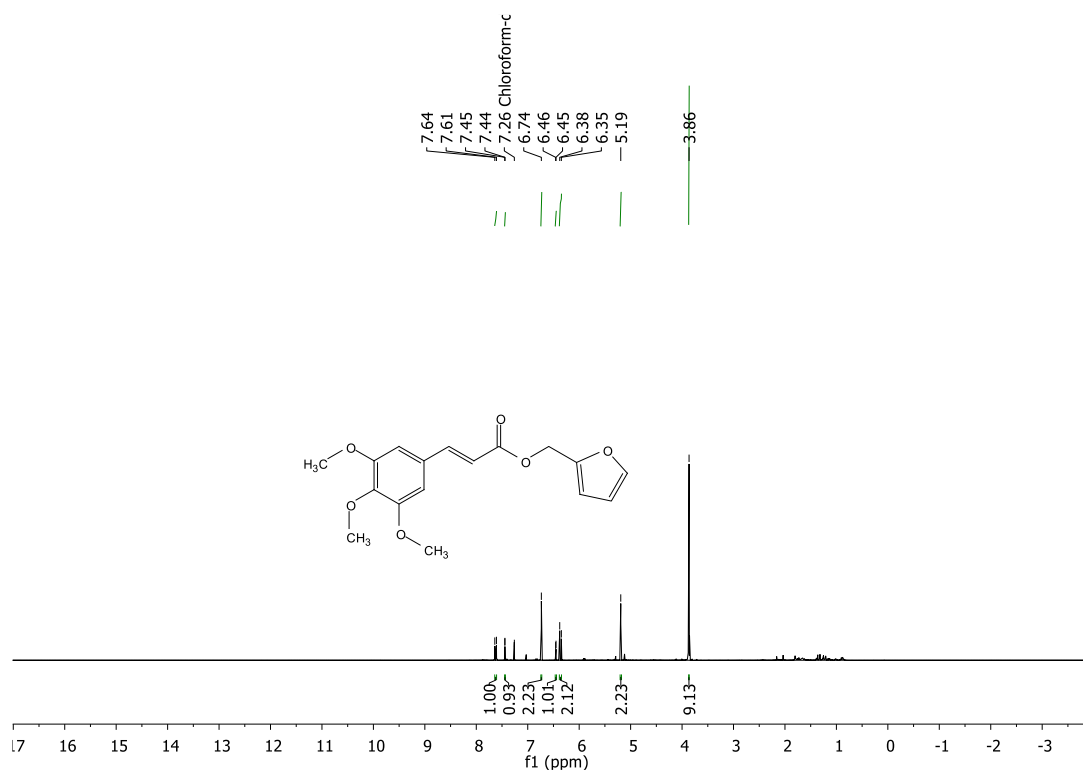

**Figure S34:**  $^1\text{H}$  NMR spectrum (500 MHz,  $\text{CDCl}_3$ ) of (*E*)-furan-2-ylmethyl 3-(3,4,5-trimethoxyphenyl)acrylate (**11**).

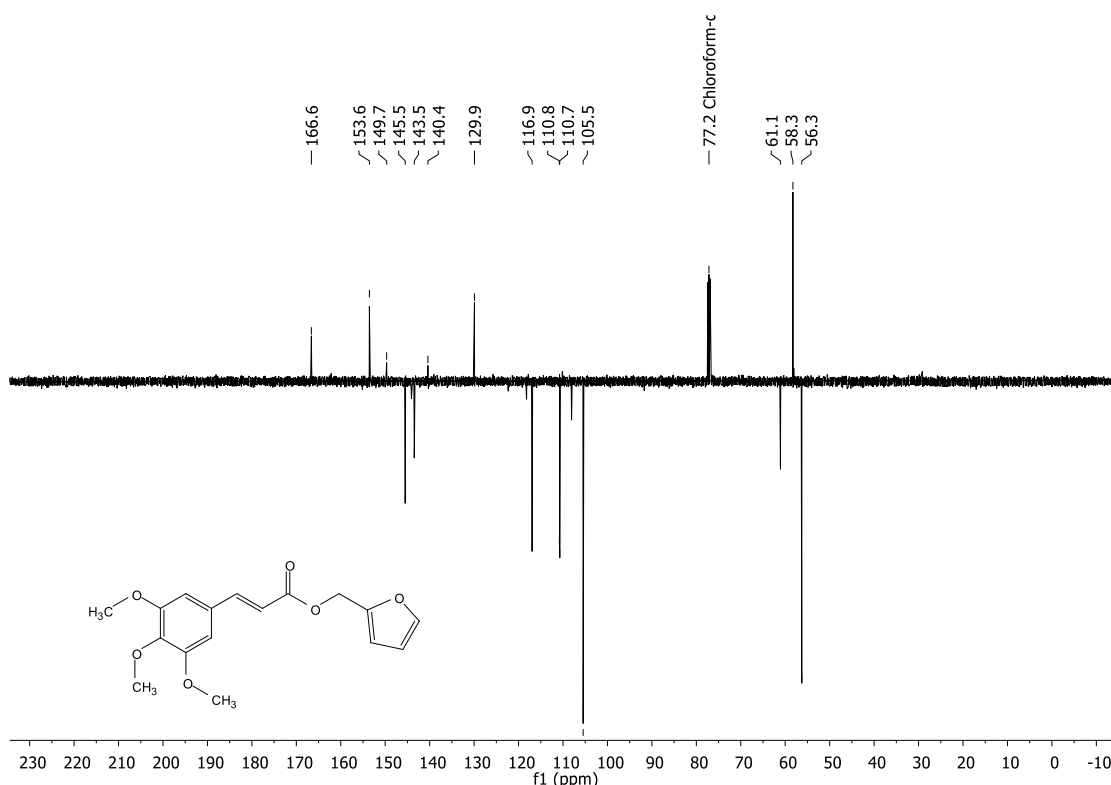

**Figure S35:** APT- $^{13}\text{C}$  NMR spectrum (125 MHz,  $\text{CDCl}_3$ ) of (*E*)-furan-2-ylmethyl 3-(3,4,5-trimethoxyphenyl)acrylate (**11**).

(*S,E*)-(4-(prop-1-en-2-yl)cyclohex-1-en-1-yl)methyl 3-(3,4,5-trimethoxyphenyl)acrylate (**12**): colorless oil; Yield: 47.6%; Reaction time: 24 h; TLC (7:3 Hex/EtOAc),  $R_f = 0.70$ ; IR  $\nu_{\text{max}}$  (KBr,  $\text{cm}^{-1}$ ): 3006, 2967, 2838, 1709, 1638, 1582, 1508, 1461, 1274, 1128, 826;  $^1\text{H}$  NMR ( $\text{CDCl}_3$ , 400 MHz):  $\delta$  7.60 (*d*;  $J=15.90$  Hz; 1H), 6.75 (*s*; 2H), 6.36 (*d*;  $J=15.90$  Hz; 1H), 5.80 (*sl*; 1H), 4.72 (*s*; 2H), 4.60 (*s*; 2H), 3.88 (*s*; 9H), 2.15 (*m*; 4H), 2.02 (*m*; 1H), 1.86 (*m*; 1H), 1.74 (*s*; 3H), 1.52 (*m*; 1H);  $^{13}\text{C}$  NMR ( $\text{CDCl}_3$ , 100 MHz):  $\delta$  167.0, 153.6, 149.7, 144.9, 140.3, 132.8, 130.1, 126.0, 117.5, 108.9, 105.4, 68.7, 61.1, 56.3, 41.0, 30.6, 27.5, 26.6, 20.8. HRMS (MALDI TOF/TOF) calculated for  $\text{C}_{22}\text{H}_{28}\text{O}_5$   $m/z$   $[\text{M}]^+$ : 372.1937, found 372.1957.

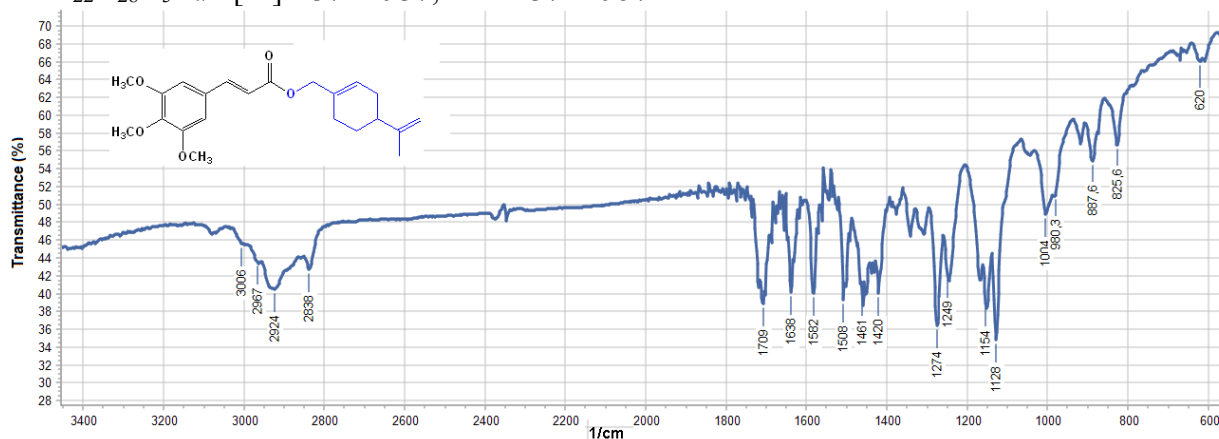

**Figure S36:** Infrared spectrum (KBr,  $\text{cm}^{-1}$ ) of (*S,E*)-(4-(prop-1-en-2-yl)cyclohex-1-en-1-yl)methyl 3-(3,4,5-trimethoxyphenyl)acrylate (**12**).

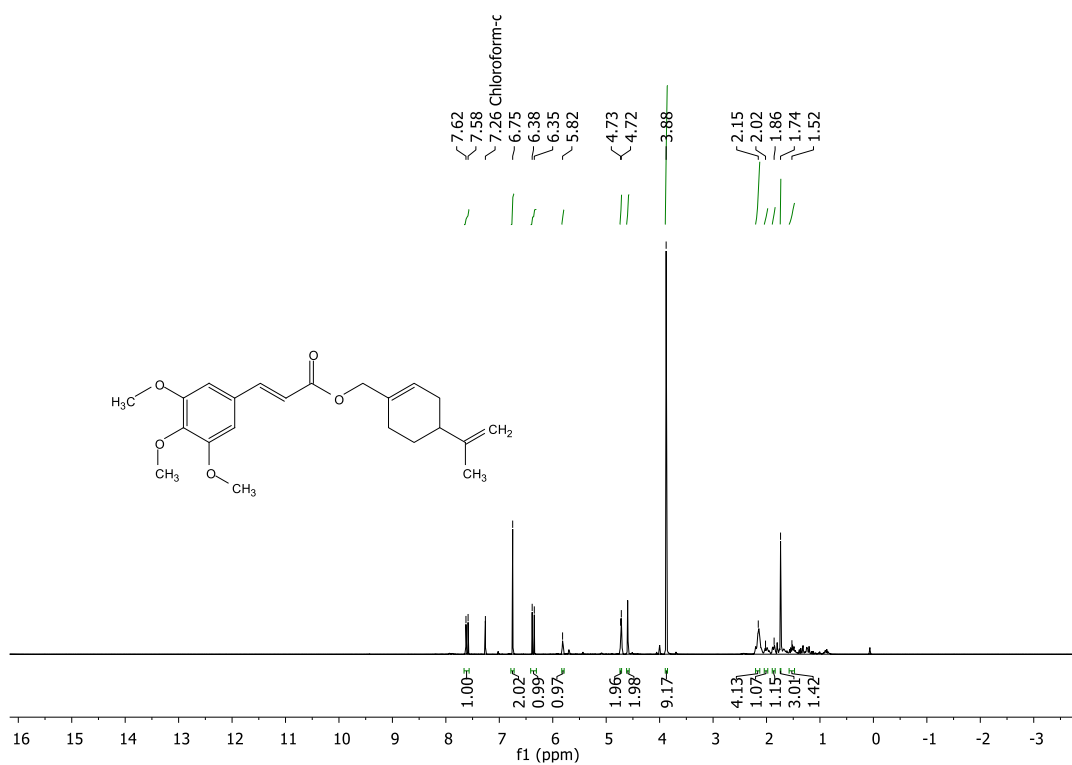

**Figure S37:** <sup>1</sup>H NMR spectrum (400 MHz, CDCl<sub>3</sub>) of *(S,E)*-(4-(prop-1-en-2-yl)cyclohex-1-en-1-yl)methyl 3-(3,4,5-trimethoxyphenyl)acrylate (12).

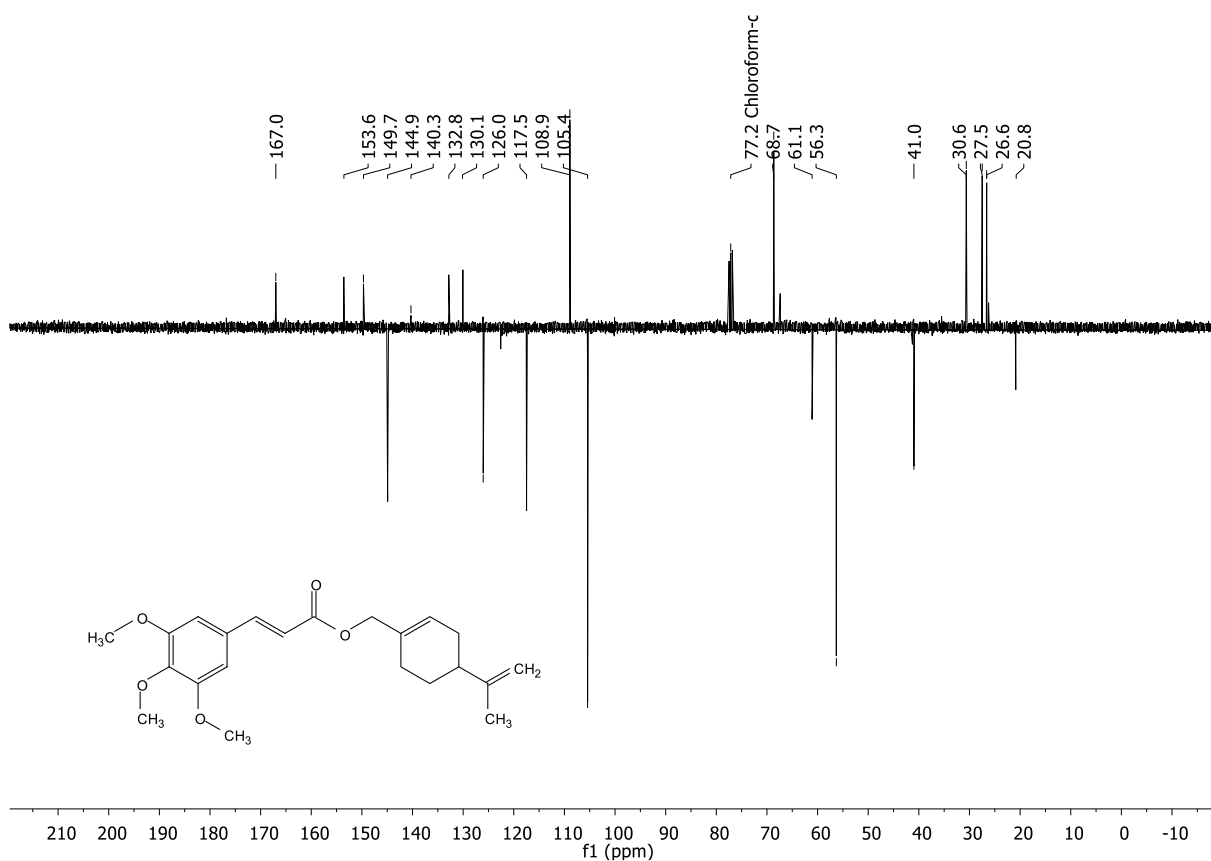

**Figure S38:** APT-<sup>13</sup>C NMR spectrum (100 MHz, CDCl<sub>3</sub>) of *(S,E)*-(4-(prop-1-en-2-yl)cyclohex-1-en-1-yl)methyl 3-(3,4,5-trimethoxyphenyl)acrylate (12).

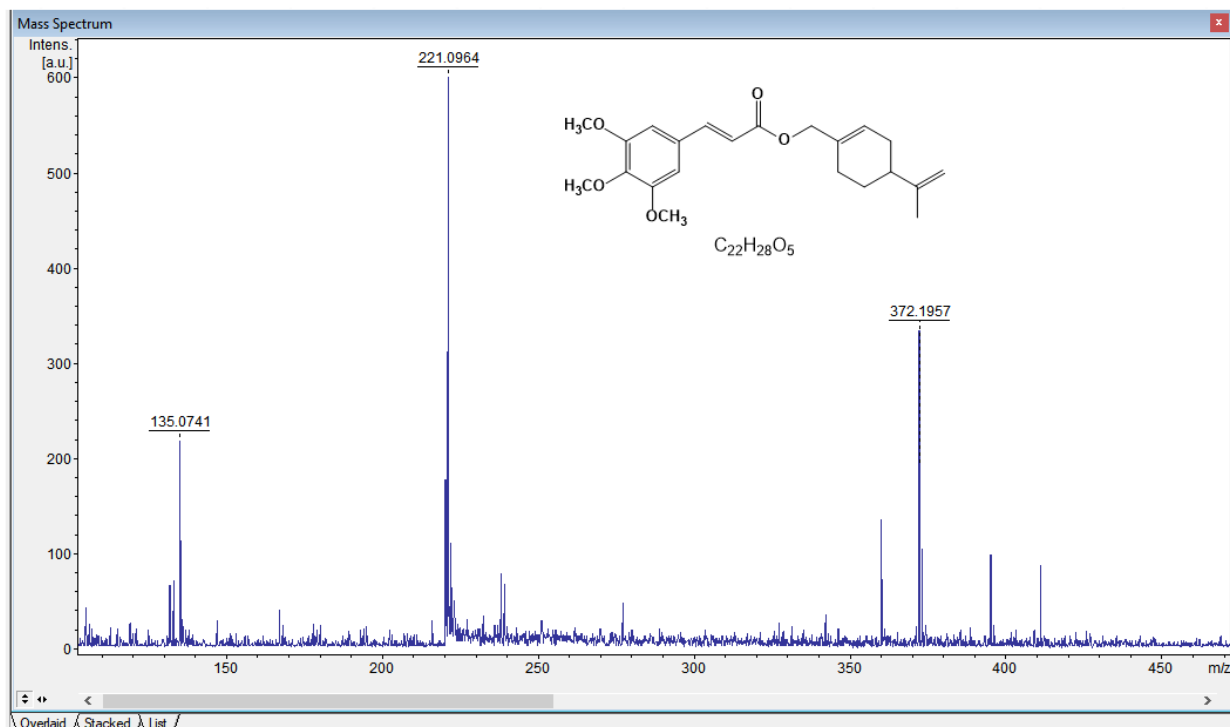

**Figure S39:** HRMS spectrum (MALDI TOF/TOF) of (*S,E*)-(4-(prop-1-en-2-yl)cyclohex-1-en-1-yl)methyl 3-(3,4,5-trimethoxyphenyl)acrylate (**12**).

((*E*)-(1*S*,2*R*,4*S*)-1,7,7-trimethylbicyclo[2.2.1]heptan-2-yl 3-(3,4,5-trimethoxyphenyl)acrylate (**13**): colorless oil; Yield: 46.2%; Reaction time: 24 h; TLC (7:3 Hex/EtOAc),  $R_f$  = 0.70; IR  $\nu_{\text{max}}$  (KBr,  $\text{cm}^{-1}$ ): 2956, 2878, 1709, 1638, 1584, 1508, 1459, 1276, 1129, 828;  $^1\text{H}$  NMR ( $\text{CDCl}_3$ , 400 MHz):  $\delta$  7.59 (*d*;  $J$ =15.90 Hz; 1H), 6.76 (*s*; 2H), 6.36 (*d*;  $J$ = 15.90 Hz; 1H), 5.02 (*ddd*;  $J$ = 9.9; 3.4; 2.1 Hz; 1H), 3.88 (*s*, 9H), 2.48 – 2.37 (*m*; 1H), 2.10 – 2.01 (*m*; 1H), 1.81 – 1.74 (*m*; 1H), 1.71 (*t*;  $J$ = 4.5 Hz; 1H), 1.40 – 1.32 (*m*; 1H), 1.30 – 1.25 (*m*; 1H), 1.05 (*dd*;  $J$ = 16.1; 6.5 Hz; 1H), 0.95 (*s*; 3H), 0.90 (*s*; 3H), 0.88 (*s*; 3H);  $^{13}\text{C}$  NMR ( $\text{CDCl}_3$ , 100 MHz):  $\delta$  167.4, 153.6, 144.3, 140.2, 130.2, 118.2, 105.4, 80.2, 61.1, 56.3, 49.1, 48.0, 45.1, 37.0, 28.2, 27.4, 19.9, 19.0, 13.7 [7].

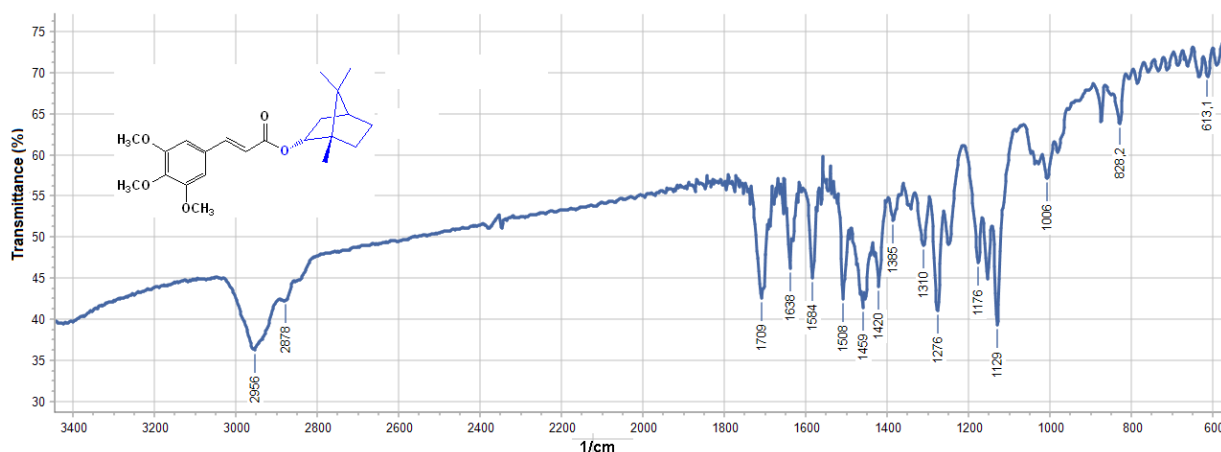

**Figure S40:** Infrared spectrum (KBr,  $\text{cm}^{-1}$ ) of ((*E*)-(1*S*,2*R*,4*S*)-1,7,7-trimethylbicyclo[2.2.1]heptan-2-yl 3-(3,4,5-trimethoxyphenyl)acrylate (**13**).

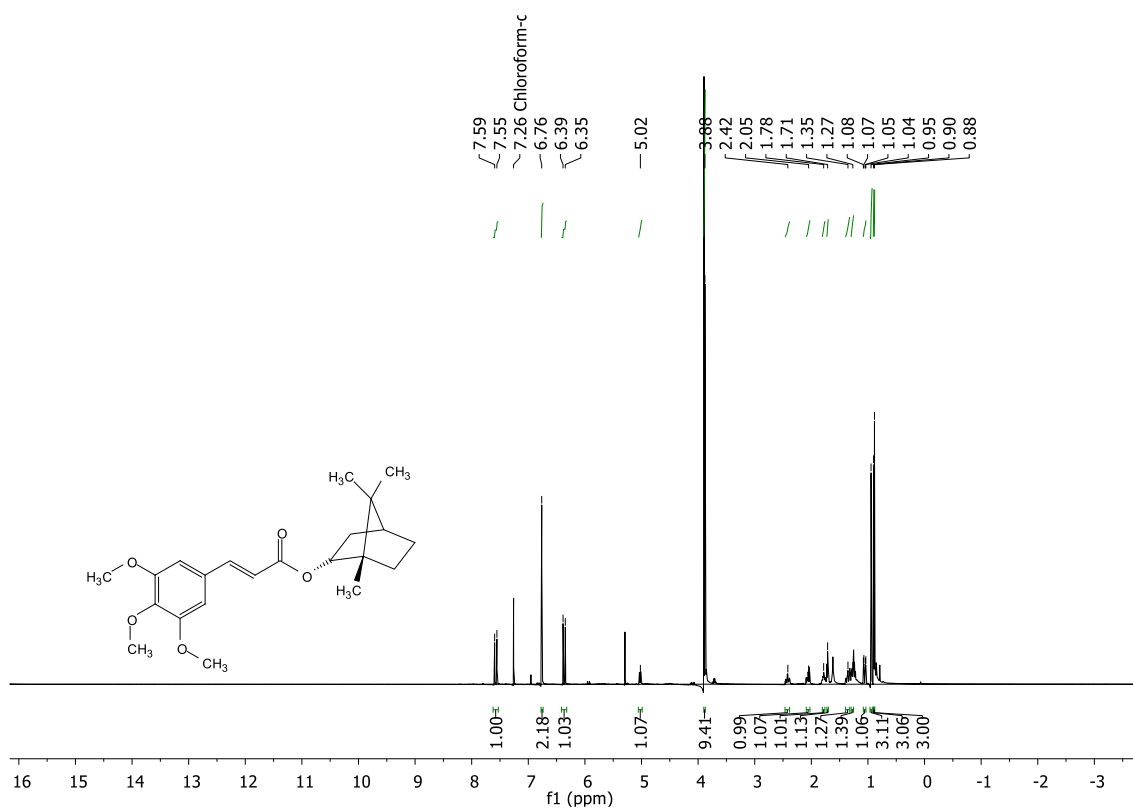

**Figure S41:** <sup>1</sup>H NMR spectrum (400 MHz, CDCl<sub>3</sub>) of ((E)-(1S,2R,4S)-1,7,7-trimethylbicyclo[2.2.1]heptan-2-yl 3-(3,4,5-trimethoxyphenyl)acrylate (13).

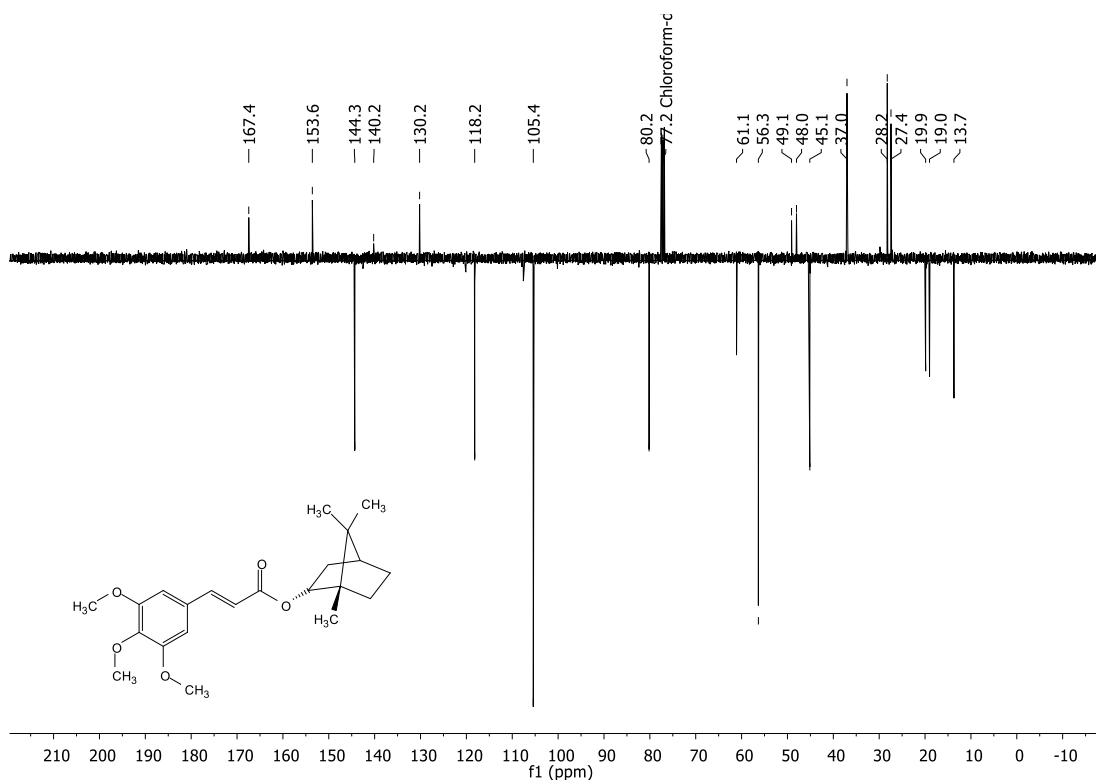

**Figure S42:** APT-<sup>13</sup>C NMR (100 MHz, CDCl<sub>3</sub>) of ((E)-(1S,2R,4S)-1,7,7-trimethylbicyclo[2.2.1]heptan-2-yl 3-(3,4,5-trimethoxyphenyl)acrylate (13).

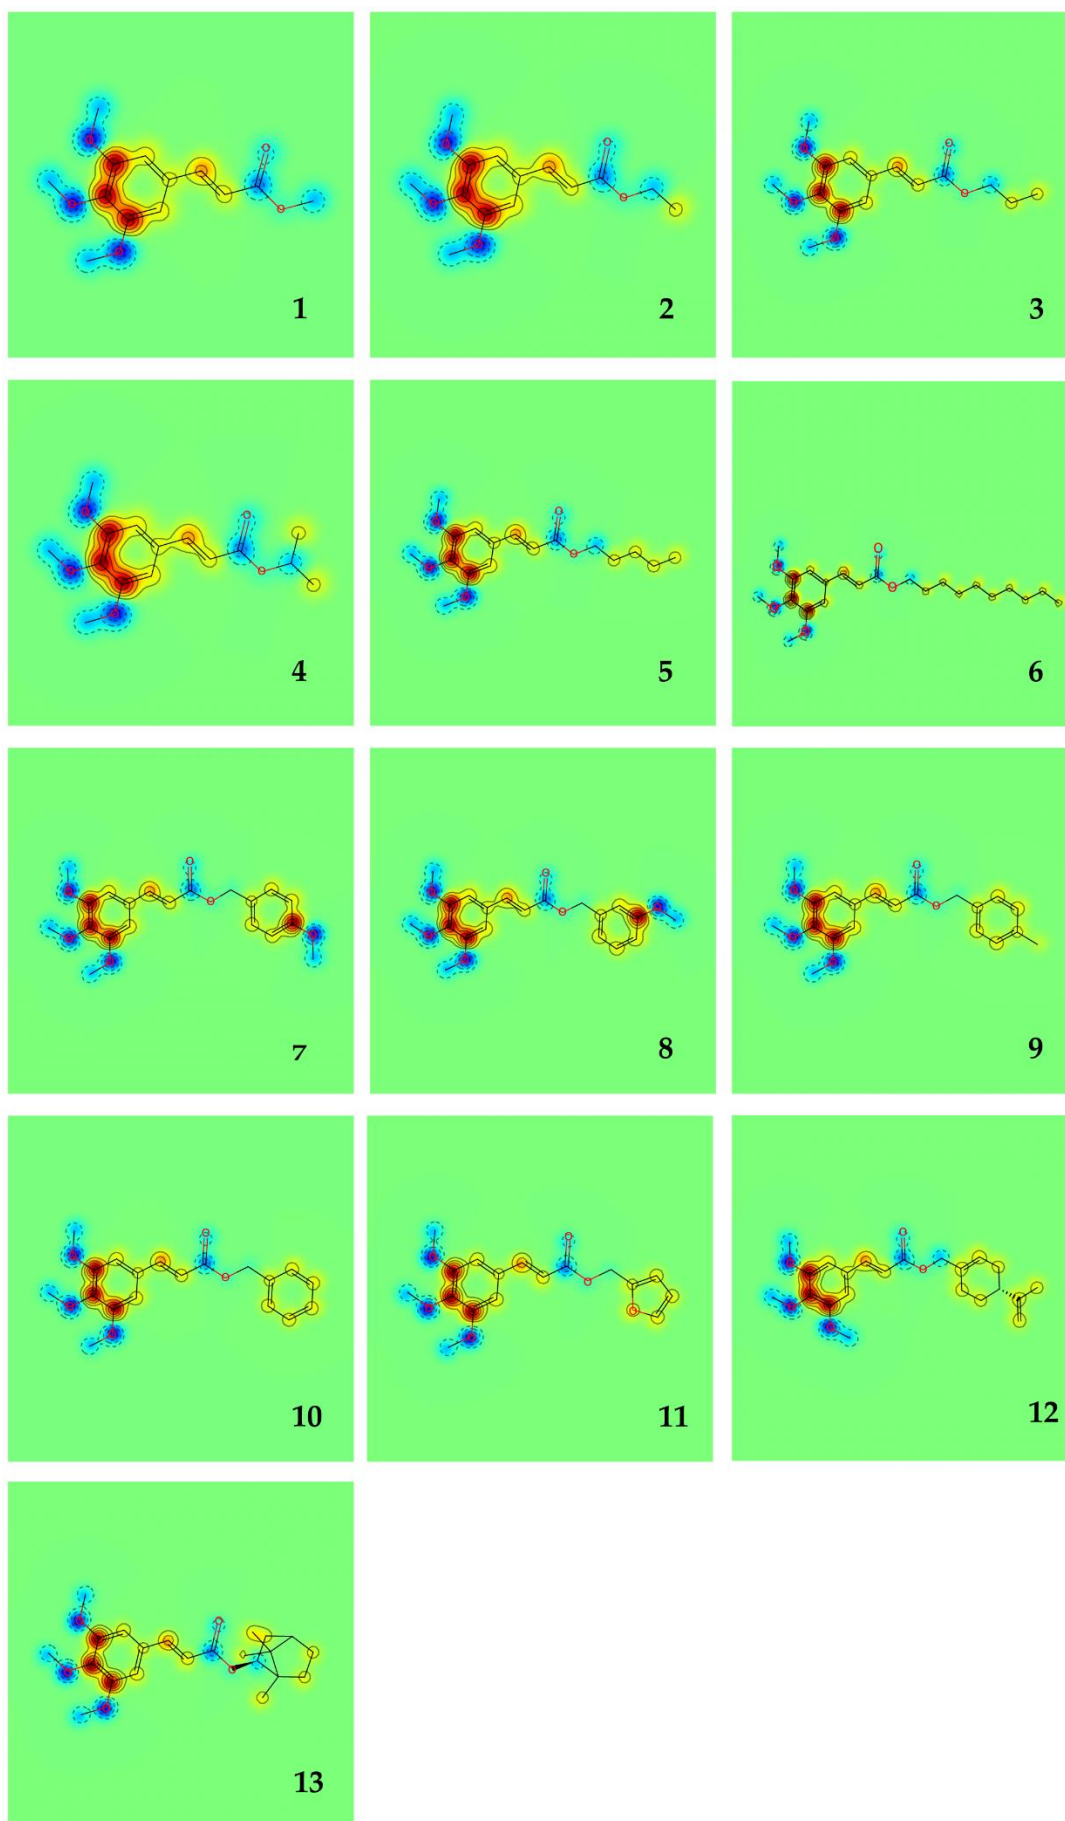

**Figure S43:** Atomic contributions to logP for compounds 1-13. The color scale goes from blue (hydrophilic) to red (hydrophobic).

**Table S1.** Predicted logarithm of the partition coefficients for compounds **1-13**.

| Compound  | logP    |
|-----------|---------|
| <b>1</b>  | 1.8986  |
| <b>2</b>  | 2.2887  |
| <b>3</b>  | 2.6788  |
| <b>4</b>  | 2.6772  |
| <b>5</b>  | 3.459   |
| <b>6</b>  | 5.4095  |
| <b>7</b>  | 3.4776  |
| <b>8</b>  | 3.4776  |
| <b>9</b>  | 3.77742 |
| <b>10</b> | 3.469   |
| <b>11</b> | 3.062   |
| <b>12</b> | 4.5714  |
| <b>13</b> | 4.4836  |

## References

- [1] Kumar, S.; Arya, P.; Mukherjee, C.; Singh, B. K.; Singh, N.; Parmar, V. S.; Prasad, A. K.; Ghosh, B. Novel Aromatic Ester from *Piper Longum* and Its Analogues Inhibit Expression of Cell Adhesion Molecules on Endothelial Cells. *Biochemistry* **2005**, *44* (48), 15944–15952. <https://doi.org/10.1021/bi050941u>.
- [2] Jung, J.-C.; Moon, S.; Min, D.; Park, W. K.; Jung, M.; Oh, S. Synthesis and Evaluation of a Series of 3,4,5-Trimethoxycinnamic Acid Derivatives as Potential Antinarcotic Agents. *Chem Biol Drug Des* **2013**, *81* (3), 389–398. <https://doi.org/10.1111/cbdd.12087>.
- [3] da Nóbrega, F.; Ozdemir, O.; Nascimento Sousa, S.; Barboza, J.; Turkez, H.; de Sousa, D. Piplartine Analogues and Cytotoxic Evaluation against Glioblastoma. *Molecules* **2018**, *23* (6), 1382. <https://doi.org/10.3390/molecules23061382>.
- [4] Zhao, Z.; Bai, Y.; Xie, J.; Chen, X.; He, X.; Sun, Y.; Bai, Y.; Zhang, Y.; Wu, S.; Zheng, X. Excavating Precursors from the Traditional Chinese Herb *Polygala tenuifolia* and *Gastrodia elata*: Synthesis, Anticonvulsant Activity Evaluation of 3,4,5-Trimethoxycinnamic Acid (TMCA) Ester Derivatives. *Bioorg Chem* **2019**, *88*, 102832. <https://doi.org/10.1016/j.bioorg.2019.03.006>.
- [5] Katritzky, A. R.; Zhang, S.; Soares, A.; Wang, M. A Facile Synthesis of Benzyl- $\alpha$ ,  $\beta$ -Unsaturated Carboxylic Esters. *ARKIVOC* **2001**, *10*, 54–57.
- [6] Nóbrega, F. R.; Silva, L. V.; Bezerra Filho, C. D. S. M.; Lima, T. C.; Castillo, Y. P.; Bezerra, D. P.; Sousa, D. P. D. Design, antileishmanial activity, and QSAR studies of a series of piplartine analogues. *J. Chem.*, **2019**, 2019.
- [7] Turkez, H.; Nóbrega, F. R. da; Ozdemir, O.; Bezerra Filho, C. da S. M.; Almeida, R. N. de; Tejera, E.; Perez-Castillo, Y.; Sousa, D. P. de. NFBTA: A Potent Cytotoxic Agent against Glioblastoma. *Molecules* **2019**, *24* (13), 2411. <https://doi.org/10.3390/molecules24132411>.
